# Supplementary material for: Influence of Chromatographic Conditions on LOD and LOQ of Fluoxetine and Sertraline Analyzed by TLC-Densitometric Method
Source: MDPI journal article supplement (doi:10.3390/pr10050971), 2022-05-12
Supplement: s1 [file s1]

# Influence of Chromatographic Conditions on LOD and LOQ of Fluoxetine and Sertraline Analyzed by TLC-Densitometric Method

Wioletta Parys and Alina Pyka-Pająk

Department of Analytical Chemistry, Faculty of Pharmaceutical Sciences in Sosnowiec, Medical University of Silesia in Katowice, Jagiellońska 4, 41-200 Sosnowiec, Poland

\*Correspondence: wparys@sum.edu.pl (W.P.); apyka@sum.edu.pl (A.P.-P.); Tel.: +48-32-364-15-34 (W.P.); +48-32-364-15-30 (A.P.-P.)

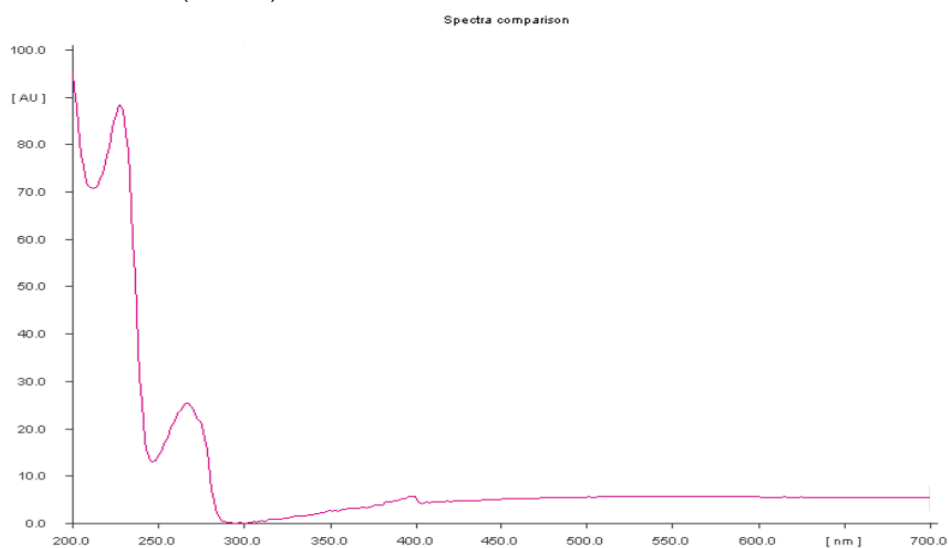

Figure S1. Spectrum of fluoxetine.

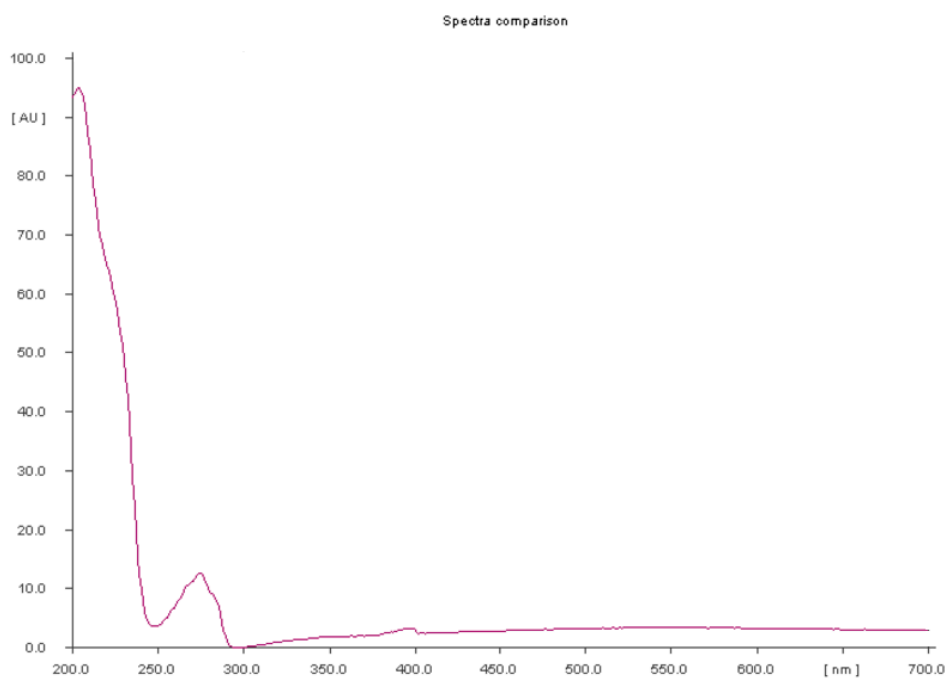

Figure S2. Spectrum of sertraline

**Table S1.** Concentrations of fluoxetine standard solutions used to determination of LOD and LOQ.

| Symbol of mobile phase | Number of plates | Concentrations of fluoxetine standard [ $\mu\text{g/spot}$ ] |      |      |
|------------------------|------------------|--------------------------------------------------------------|------|------|
| <b>A</b>               | 1.05715          | 0.60                                                         | 0.70 | 0.80 |
|                        | 1.05721          | 0.70                                                         | 0.80 | 0.90 |
|                        | 1.05567          | 0.80                                                         | 0.90 | 1.0  |
|                        | 1.05747          | 0.70                                                         | 0.80 | 0.90 |
| <b>B</b>               | 1.05715          | 0.60                                                         | 0.70 | 0.80 |
|                        | 1.05721          | 0.60                                                         | 0.70 | 0.80 |
|                        | 1.05567          | 0.60                                                         | 0.70 | 0.80 |
|                        | 1.05747          | 0.60                                                         | 0.70 | 0.80 |
| <b>C</b>               | 1.05715          | 0.60                                                         | 0.70 | 0.80 |
|                        | 1.05721          | 0.60                                                         | 0.70 | 0.80 |
|                        | 1.05567          | 0.60                                                         | 0.70 | 0.80 |
|                        | 1.05747          | 0.60                                                         | 0.70 | 0.80 |
| <b>D</b>               | 1.05559          | 0.60                                                         | 0.70 | 0.80 |
|                        | 1.05747          | 0.80                                                         | 0.90 | 1.00 |
| <b>E</b>               | 1.05559          | 0.60                                                         | 0.70 | 0.80 |
|                        | 1.05747          | 0.80                                                         | 0.90 | 1.0  |
| <b>F</b>               | 1.05559          | 0.80                                                         | 0.90 | 1.0  |
|                        | 1.05747          | 0.60                                                         | 0.70 | 0.80 |
| <b>G</b>               | 1.05559          | 0.70                                                         | 0.80 | 0.90 |
|                        | 1.05747          | 0.70                                                         | 0.80 | 0.90 |

**Mobile phases:** **A** chloroform + methanol + ammonia- 9:1:0.4 (v/v/v); **B**- chloroform + methanol + glacial acetic acid- 5:4:1 (v/v/v); **C**- acetone + toluene + ammonia- 10:9:1 (v/v/v); **D**- methanol + water 10:0 (v/v); **E**- methanol + water 9:1 (v/v); **F**- acetone + water 10:0 (v/v); **G**- acetone + water - 9:1 (v/v).  
**Chromatographic plates:** 1.05715 – silica gel 60 F<sub>254</sub> on glass plates; 1.05721 silica gel 60 on glass plates; 1.05567 – mixture of silica gel 60 and kieselghur F<sub>254</sub> on aluminium plates; 1.05747 – silanized silica gel 60F<sub>254</sub> (RP-2) on glass plates; 1.05559 – silica gel RP-18F<sub>254</sub> on aluminium plates

**Table S2.** Concentrations of sertraline standard solutions used to determination of LOD and LOQ.

| Symbol of mobile phase | Number of plates | Concentrations of sertraline standard [ $\mu\text{g}/\text{spot}$ ] |      |      |
|------------------------|------------------|---------------------------------------------------------------------|------|------|
| B                      | 1.05715          | 0.40                                                                | 0.60 | 0.80 |
|                        | 1.05721          | 0.40                                                                | 0.60 | 0.80 |
|                        | 1.05567          | 0.40                                                                | 0.60 | 0.80 |
|                        | 1.05747          | 0.40                                                                | 0.60 | 0.80 |
| C                      | 1.05715          | 0.40                                                                | 0.60 | 0.80 |
|                        | 1.05721          | 0.40                                                                | 0.60 | 0.80 |
|                        | 1.05567          | 0.40                                                                | 0.60 | 0.80 |
|                        | 1.05747          | 0.40                                                                | 0.60 | 0.80 |
| D                      | 1.05559          | 0.20                                                                | 0.40 | 0.60 |
|                        | 1.05747          | 0.20                                                                | 0.40 | 0.60 |
| E                      | 1.05559          | 0.20                                                                | 0.40 | 0.60 |
|                        | 1.05747          | 0.20                                                                | 0.40 | 0.60 |
| F                      | 1.05559          | 0.20                                                                | 0.40 | 0.60 |
|                        | 1.05747          | 0.20                                                                | 0.40 | 0.60 |
| G                      | 1.05559          | 0.20                                                                | 0.40 | 0.60 |
|                        | 1.05747          | 0.40                                                                | 0.60 | 0.80 |

**Mobile phases:** **A** chloroform + methanol + ammonia- 9:1:0.4 (v/v/v); **B**- chloroform + methanol + glacial acetic acid- 5:4:1 (v/v/v); **C**- acetone + toluene + ammonia- 10:9:1 (v/v/v); **D**- methanol + water 10:0 (v/v); **E**- methanol + water 9:1 (v/v); **F**- acetone + water 10:0 (v/v); **G**- acetone + water - 9:1 (v/v).  
**Chromatographic plates:** 1.05715 – silica gel 60 F<sub>254</sub> on glass plates; 1.05721 silica gel 60 on glass plates; 1.05567 – mixture of silica gel 60 and kieselghur F<sub>254</sub> on aluminium plates; 1.05747 – silanized silica gel 60F<sub>254</sub> (RP-2) on glass plates; 1.05559 – silica gel RP-18F<sub>254</sub> on aluminium plates

**Table S3.** Results for fluoxetine obtained by NP-TLC technique using silica gel 60F<sub>254</sub> on glass plates (#1.05715) and chloroform + methanol + ammonia (9: 1: 0.4, v/v/v) as mobile phase.

| Amount of fluoxetine spotted onto chromatographic plate [ $\mu\text{g/spot}$ ]                                                | 0.60   | 0.70 | 0.80 |
|-------------------------------------------------------------------------------------------------------------------------------|--------|------|------|
| Spot area of fluoxetine [AU]                                                                                                  | 1518   | 2097 | 2376 |
|                                                                                                                               | 1691   | 2129 | 2485 |
|                                                                                                                               | 1588   | 2058 | 2399 |
| Average value of spot area of fluoxetine [AU]                                                                                 | 1599   | 2095 | 2420 |
| Standard deviation [AU]                                                                                                       | 87.0   | 35.6 | 57.5 |
| Coefficient of variation [%]                                                                                                  | 5.44   | 1.70 | 2.37 |
| <b>Parameters characterizing the calibration curve used (<math>\text{AU} = a + S \cdot x</math>) to determine LOD and LOQ</b> |        |      |      |
| Intercept ( $a$ )                                                                                                             | -835.6 |      |      |
| Slope ( $S$ )                                                                                                                 | 4105.0 |      |      |
| Correlation coefficient                                                                                                       | 0.9814 |      |      |
| Standard deviation of intercept ( $\sigma_a$ )                                                                                | 214.2  |      |      |
| Standard deviation of slope ( $\sigma_b$ )                                                                                    | 303.9  |      |      |
| Residual standard deviation of calibration curve ( $\sigma_{xy}$ )                                                            | 74.4   |      |      |

**Table S4.** Results for fluoxetine obtained by NP-TLC technique using silica gel 60 on glass plates (#1.05721) and chloroform + methanol + ammonia (9: 1: 0.4, v/v/v) as mobile phase.

| Amount of fluoxetine spotted onto chromatographic plate [ $\mu\text{g/spot}$ ]                                                | 0.70    | 0.80 | 0.90 |
|-------------------------------------------------------------------------------------------------------------------------------|---------|------|------|
| Spot area of fluoxetine [AU]                                                                                                  | 1292    | 2068 | 2870 |
|                                                                                                                               | 1345    | 2145 | 2941 |
|                                                                                                                               | 1128    | 2247 | 2783 |
| Average value of spot area of fluoxetine [AU]                                                                                 | 1255    | 2153 | 2865 |
| Standard deviation [AU]                                                                                                       | 113.1   | 89.8 | 79.1 |
| Coefficient of variation [%]                                                                                                  | 9.01    | 4.17 | 2.76 |
| <b>Parameters characterizing the calibration curve used (<math>\text{AU} = a + S \cdot x</math>) to determine LOD and LOQ</b> |         |      |      |
| Intercept ( $a$ )                                                                                                             | -4347.7 |      |      |
| Slope ( $S$ )                                                                                                                 | 8048.3  |      |      |
| Correlation coefficient                                                                                                       | 0.9909  |      |      |
| Standard deviation of intercept ( $\sigma_a$ )                                                                                | 332.3   |      |      |
| Standard deviation of slope ( $\sigma_b$ )                                                                                    | 413.3   |      |      |
| Residual standard deviation of calibration curve ( $\sigma_{xy}$ )                                                            | 101.2   |      |      |

**Table S5.** Results for fluoxetine obtained by NP-TLC technique using mixture of silica gel 60 and kieselghur F<sub>254</sub> on aluminum plates (#1.05567) and chloroform + methanol + ammonia (9: 1: 0.4, v/v/v) as mobile phase.

| Amount of fluoxetine spotted onto chromatographic plate [ $\mu\text{g/spot}$ ]                                                | 0.80   | 0.90 | 1.00 |
|-------------------------------------------------------------------------------------------------------------------------------|--------|------|------|
|                                                                                                                               | 1568   | 1802 | 2189 |
| Spot area of fluoxetine [AU]                                                                                                  | 1685   | 1871 | 2079 |
|                                                                                                                               | 1499   | 1817 | 2251 |
| Average value of spot area of fluoxetine [AU]                                                                                 | 1584   | 1830 | 2173 |
| Standard deviation [AU]                                                                                                       | 94.0   | 36.3 | 87.1 |
| Coefficient of variation [%]                                                                                                  | 5.94   | 1.98 | 4.01 |
| <b>Parameters characterizing the calibration curve used (<math>\text{AU} = a + S \cdot x</math>) to determine LOD and LOQ</b> |        |      |      |
| Intercept ( $a$ )                                                                                                             | -788.2 |      |      |
| Slope ( $S$ )                                                                                                                 | 2945.0 |      |      |
| Correlation coefficient                                                                                                       | 0.9635 |      |      |
| Standard deviation of intercept ( $\sigma_a$ )                                                                                | 279.6  |      |      |
| Standard deviation of slope ( $\sigma_b$ )                                                                                    | 309.4  |      |      |
| Residual standard deviation of calibration curve ( $\sigma_{xy}$ )                                                            | 75.8   |      |      |

**Table S6.** Results for fluoxetine obtained by NP-TLC technique using silanized silica gel 60F<sub>254</sub> (RP-2) on glass plates (#1.05747) and chloroform + methanol + ammonia (9: 1: 0.4, v/v/v) as mobile phase.

| Amount of fluoxetine spotted onto chromatographic plate [ $\mu\text{g/spot}$ ]                                                | 0.70    | 0.80 | 0.90 |
|-------------------------------------------------------------------------------------------------------------------------------|---------|------|------|
|                                                                                                                               | 2382    | 2681 | 3309 |
| Spot area of fluoxetine [AU]                                                                                                  | 2125    | 2722 | 3222 |
|                                                                                                                               | 2247    | 2589 | 3132 |
| Average value of spot area of fluoxetine [AU]                                                                                 | 2251    | 2664 | 3221 |
| Standard deviation [AU]                                                                                                       | 128.6   | 68.1 | 88.5 |
| Coefficient of variation [%]                                                                                                  | 5.71    | 2.56 | 2.75 |
| <b>Parameters characterizing the calibration curve used (<math>\text{AU} = a + S \cdot x</math>) to determine LOD and LOQ</b> |         |      |      |
| Intercept ( $a$ )                                                                                                             | -1166.6 |      |      |
| Slope ( $S$ )                                                                                                                 | 4848.3  |      |      |
| Correlation coefficient                                                                                                       | 0.9766  |      |      |
| Standard deviation of intercept ( $\sigma_a$ )                                                                                | 324.6   |      |      |
| Standard deviation of slope ( $\sigma_b$ )                                                                                    | 403.6   |      |      |
| Residual standard deviation of calibration curve ( $\sigma_{xy}$ )                                                            | 98.9    |      |      |

**Table S7.** Results for fluoxetine obtained by NP-TLC technique using silica gel 60F<sub>254</sub> on glass plates (#1.05715) and chloroform + methanol + glacial acetic acid (5:4:1 v/v/v) as mobile phase.

| Amount of fluoxetine spotted onto chromatographic plate [ $\mu\text{g/spot}$ ]                                                | 0.60 | 0.70 | 0.80   |
|-------------------------------------------------------------------------------------------------------------------------------|------|------|--------|
| Spot area of fluoxetine [AU]                                                                                                  | 1025 | 1542 | 1725   |
|                                                                                                                               | 1141 | 1487 | 1725   |
|                                                                                                                               | 1218 | 1502 | 1843   |
| Average value of spot area of fluoxetine [AU]                                                                                 | 1128 | 1510 | 1764   |
| Standard deviation [AU]                                                                                                       | 97.2 | 28.4 | 68.1   |
| Coefficient of variation [%]                                                                                                  | 8.61 | 1.88 | 3.86   |
| <b>Parameters characterizing the calibration curve used (<math>\text{AU} = a + S \cdot x</math>) to determine LOD and LOQ</b> |      |      |        |
| Intercept ( $a$ )                                                                                                             |      |      | -759.6 |
| Slope ( $S$ )                                                                                                                 |      |      | 3181.7 |
| Correlation coefficient                                                                                                       |      |      | 0.9701 |
| Standard deviation of intercept ( $\sigma_a$ )                                                                                |      |      | 212.0  |
| Standard deviation of slope ( $\sigma_b$ )                                                                                    |      |      | 300.8  |
| Residual standard deviation of calibration curve ( $\sigma_{xy}$ )                                                            |      |      | 73.7   |

**Table S8.** Results for fluoxetine obtained by NP-TLC technique using silica gel 60 on glass plates (#1.05721) and chloroform + methanol + glacial acetic acid (5:4:1 v/v/v) as mobile phase.

| Amount of fluoxetine spotted onto chromatographic plate [ $\mu\text{g/spot}$ ]                                                | 0.60 | 0.70  | 0.80    |
|-------------------------------------------------------------------------------------------------------------------------------|------|-------|---------|
| Spot area of fluoxetine [AU]                                                                                                  | 1083 | 1825  | 2368    |
|                                                                                                                               | 1125 | 2021  | 2455    |
|                                                                                                                               | 1189 | 2125  | 2523    |
| Average value of spot area of fluoxetine [AU]                                                                                 | 1132 | 1990  | 2449    |
| Standard deviation [AU]                                                                                                       | 53.4 | 152.3 | 77.7    |
| Coefficient of variation [%]                                                                                                  | 4.71 | 7.65  | 3.17    |
| <b>Parameters characterizing the calibration curve used (<math>\text{AU} = a + S \cdot x</math>) to determine LOD and LOQ</b> |      |       |         |
| Intercept ( $a$ )                                                                                                             |      |       | -2750.1 |
| Slope ( $S$ )                                                                                                                 |      |       | 6581.7  |
| Correlation coefficient                                                                                                       |      |       | 0.9734  |
| Standard deviation of intercept ( $\sigma_a$ )                                                                                |      |       | 412.7   |
| Standard deviation of slope ( $\sigma_b$ )                                                                                    |      |       | 585.6   |
| Residual standard deviation of calibration curve ( $\sigma_{xy}$ )                                                            |      |       | 143.5   |

**Table S9.** Results for fluoxetine obtained by NP-TLC technique using mixture of silica gel 60 and kieselghur F<sub>254</sub> on aluminum plates (#1.05567) and chloroform + methanol + glacial acetic acid (5:4:1 v/v/v) as mobile phase.

| Amount of fluoxetine spotted onto chromatographic plate [ $\mu\text{g/spot}$ ]                                         | 0,60 | 0,70   | 0,80 |
|------------------------------------------------------------------------------------------------------------------------|------|--------|------|
| Spot area of fluoxetine [AU]                                                                                           | 1120 | 1336   | 1503 |
|                                                                                                                        | 1157 | 1314   | 1487 |
|                                                                                                                        | 1118 | 1388   | 1555 |
| Average value of spot area of fluoxetine [AU]                                                                          | 1132 | 1346   | 1515 |
| Standard deviation [AU]                                                                                                | 22.0 | 38.0   | 35.6 |
| Coefficient of variation [%]                                                                                           | 1.94 | 2.82   | 2.35 |
| <b>Parameters characterizing the calibration curve used (<math>AU = a + S \cdot x</math>) to determine LOD and LOQ</b> |      |        |      |
| Intercept ( $a$ )                                                                                                      |      | -10.8  |      |
| Slope ( $S$ )                                                                                                          |      | 1916.7 |      |
| Correlation coefficient                                                                                                |      | 0.9836 |      |
| Standard deviation of intercept ( $\sigma_a$ )                                                                         |      | 93.6   |      |
| Standard deviation of slope ( $\sigma_b$ )                                                                             |      | 132.8  |      |
| Residual standard deviation of calibration curve ( $\sigma_{xy}$ )                                                     |      | 32.5   |      |

**Table S10.** Results for fluoxetine obtained by NP-TLC technique using silanized silica gel 60F<sub>254</sub> (RP-2) on glass plates (#1.05747) and chloroform + methanol + glacial acetic acid (5:4:1 v/v/v) as mobile phase.

| Amount of fluoxetine spotted onto chromatographic plate [ $\mu\text{g/spot}$ ]                                         | 0.60 | 0.70   | 0.80 |
|------------------------------------------------------------------------------------------------------------------------|------|--------|------|
| Spot area of fluoxetine [AU]                                                                                           | 2108 | 2208   | 2432 |
|                                                                                                                        | 1992 | 2229   | 2533 |
|                                                                                                                        | 2046 | 2324   | 2622 |
| Average value of spot area of fluoxetine [AU]                                                                          | 2049 | 2254   | 2529 |
| Standard deviation [AU]                                                                                                | 58.0 | 61.8   | 95.1 |
| Coefficient of variation [%]                                                                                           | 2.83 | 2.74   | 3.76 |
| <b>Parameters characterizing the calibration curve used (<math>AU = a + S \cdot x</math>) to determine LOD and LOQ</b> |      |        |      |
| Intercept ( $a$ )                                                                                                      |      | 595.9  |      |
| Slope ( $S$ )                                                                                                          |      | 2401.7 |      |
| Correlation coefficient                                                                                                |      | 0.9530 |      |
| Standard deviation of intercept ( $\sigma_a$ )                                                                         |      | 203.2  |      |
| Standard deviation of slope ( $\sigma_b$ )                                                                             |      | 288.4  |      |
| Residual standard deviation of calibration curve ( $\sigma_{xy}$ )                                                     |      | 70.6   |      |

**Table S11.** Results for fluoxetine obtained by NP-TLC technique using silica gel 60F<sub>254</sub> on glass plates (#1.05715) and acetone + toluene + ammonia (10:9:1, v/v/v) as mobile phase.

| Amount of fluoxetine spotted onto chromatographic plate [ $\mu\text{g/spot}$ ]                                                | 0.60   | 0.70 | 0.80 |
|-------------------------------------------------------------------------------------------------------------------------------|--------|------|------|
| Spot area of fluoxetine [AU]                                                                                                  | 912    | 1089 | 1254 |
|                                                                                                                               | 972    | 1175 | 1234 |
|                                                                                                                               | 1021   | 1182 | 1321 |
| Average value of spot area of fluoxetine [AU]                                                                                 | 968    | 1149 | 1270 |
| Standard deviation [AU]                                                                                                       | 54.6   | 51.8 | 45.6 |
| Coefficient of variation [%]                                                                                                  | 5.64   | 4.51 | 3.59 |
| <b>Parameters characterizing the calibration curve used (<math>\text{AU} = a + S \cdot x</math>) to determine LOD and LOQ</b> |        |      |      |
| Intercept ( $a$ )                                                                                                             | 74.2   |      |      |
| Slope ( $S$ )                                                                                                                 | 1506.7 |      |      |
| Correlation coefficient                                                                                                       | 0.9422 |      |      |
| Standard deviation of intercept ( $\sigma_a$ )                                                                                | 142.8  |      |      |
| Standard deviation of slope ( $\sigma_b$ )                                                                                    | 202.6  |      |      |
| Residual standard deviation of calibration curve ( $\sigma_{xy}$ )                                                            | 49.6   |      |      |

**Table S12.** Results for fluoxetine obtained by NP-TLC technique using silica gel 60 on glass plates (#1.05721) and acetone + toluene + ammonia (10:9:1, v/v/v) as mobile phase.

| Amount of fluoxetine spotted onto chromatographic plate [ $\mu\text{g/spot}$ ]                                                | 0.60   | 0.70 | 0.80 |
|-------------------------------------------------------------------------------------------------------------------------------|--------|------|------|
| Spot area of fluoxetine [AU]                                                                                                  | 1527   | 1817 | 1974 |
|                                                                                                                               | 1588   | 1756 | 2008 |
|                                                                                                                               | 1489   | 1721 | 2087 |
| Average value of spot area of fluoxetine [AU]                                                                                 | 1535   | 1765 | 2023 |
| Standard deviation [AU]                                                                                                       | 49.9   | 48.6 | 58.0 |
| Coefficient of variation [%]                                                                                                  | 3.25   | 2.75 | 2.87 |
| <b>Parameters characterizing the calibration curve used (<math>\text{AU} = a + S \cdot x</math>) to determine LOD and LOQ</b> |        |      |      |
| Intercept ( $a$ )                                                                                                             | 64.9   |      |      |
| Slope ( $S$ )                                                                                                                 | 2441.7 |      |      |
| Correlation coefficient                                                                                                       | 0.9773 |      |      |
| Standard deviation of intercept ( $\sigma_a$ )                                                                                | 141.1  |      |      |
| Standard deviation of slope ( $\sigma_b$ )                                                                                    | 200.2  |      |      |
| Residual standard deviation of calibration curve ( $\sigma_{xy}$ )                                                            | 49.0   |      |      |



**Table S13.** Results for fluoxetine obtained by NP-TLC technique using mixture of silica gel 60 and kieselghur F<sub>254</sub> on aluminum plates (#1.05567) and acetone + toluene + ammonia (10:9:1, v/v/v) as mobile phase.

| Amount of fluoxetine spotted onto chromatographic plate [ $\mu\text{g/spot}$ ]                                                | 0.60   | 0.70 | 0.80 |
|-------------------------------------------------------------------------------------------------------------------------------|--------|------|------|
| Spot area of fluoxetine [AU]                                                                                                  | 1018   | 1342 | 1693 |
|                                                                                                                               | 1161   | 1294 | 1593 |
|                                                                                                                               | 1085   | 1152 | 1625 |
| Average value of spot area of fluoxetine [AU]                                                                                 | 1088   | 1263 | 1637 |
| Standard deviation [AU]                                                                                                       | 71.5   | 98.8 | 51.1 |
| Coefficient of variation [%]                                                                                                  | 6.58   | 7.82 | 3.12 |
| <b>Parameters characterizing the calibration curve used (<math>\text{AU} = a + S \cdot x</math>) to determine LOD and LOQ</b> |        |      |      |
| Intercept ( $a$ )                                                                                                             | -592.3 |      |      |
| Slope ( $S$ )                                                                                                                 | 2745.0 |      |      |
| Correlation coefficient                                                                                                       | 0.9443 |      |      |
| Standard deviation of intercept ( $\sigma_a$ )                                                                                | 254.8  |      |      |
| Standard deviation of slope ( $\sigma_b$ )                                                                                    | 361.6  |      |      |
| Residual standard deviation of calibration curve ( $\sigma_{xy}$ )                                                            | 88.6   |      |      |

**Table S14.** Results for fluoxetine obtained by NP-TLC technique using silanized silica gel 60F<sub>254</sub> (RP-2) on glass plates (#1.05747) and acetone + toluene + ammonia (10:9:1, v/v/v) as mobile phase.

| Amount of fluoxetine spotted onto chromatographic plate [ $\mu\text{g/spot}$ ]                                                | 0.60   | 0.70 | 0.80 |
|-------------------------------------------------------------------------------------------------------------------------------|--------|------|------|
| Spot area of fluoxetine [AU]                                                                                                  | 1820   | 2120 | 2455 |
|                                                                                                                               | 1789   | 2208 | 2491 |
|                                                                                                                               | 1829   | 2189 | 2525 |
| Average value of spot area of fluoxetine [AU]                                                                                 | 1813   | 2172 | 2490 |
| Standard deviation [AU]                                                                                                       | 21.0   | 46.3 | 35.0 |
| Coefficient of variation [%]                                                                                                  | 1.16   | 2.13 | 1.41 |
| <b>Parameters characterizing the calibration curve used (<math>\text{AU} = a + S \cdot x</math>) to determine LOD and LOQ</b> |        |      |      |
| Intercept ( $a$ )                                                                                                             | -213.4 |      |      |
| Slope ( $S$ )                                                                                                                 | 3388.3 |      |      |
| Correlation coefficient                                                                                                       | 0.9939 |      |      |
| Standard deviation of intercept ( $\sigma_a$ )                                                                                | 100.2  |      |      |
| Standard deviation of slope ( $\sigma_b$ )                                                                                    | 142.2  |      |      |
| Residual standard deviation of calibration curve ( $\sigma_{xy}$ )                                                            | 34.8   |      |      |

**Table S15.** Results for fluoxetine obtained by RP-TLC technique using silica gel RP-18F<sub>254</sub> on aluminum plates (#1.05559) and methanol+water (10:0, v/v/v) as mobile phase.

| Amount of fluoxetine spotted onto chromatographic plate [ $\mu\text{g/spot}$ ]                                                | 0.60   | 0.70 | 0.80  |
|-------------------------------------------------------------------------------------------------------------------------------|--------|------|-------|
| Spot area of fluoxetine [AU]                                                                                                  | 3223   | 3388 | 3920  |
|                                                                                                                               | 3313   | 3450 | 4120  |
|                                                                                                                               | 3025   | 3560 | 4025  |
| Average value of spot area of fluoxetine [AU]                                                                                 | 3187   | 3466 | 4022  |
| Standard deviation [AU]                                                                                                       | 147.3  | 87.1 | 100.0 |
| Coefficient of variation [%]                                                                                                  | 4.62   | 2.51 | 2.49  |
| <b>Parameters characterizing the calibration curve used (<math>\text{AU} = a + S \cdot x</math>) to determine LOD and LOQ</b> |        |      |       |
| Intercept ( $a$ )                                                                                                             | 636.9  |      |       |
| Slope ( $S$ )                                                                                                                 | 4173.3 |      |       |
| Correlation coefficient                                                                                                       | 0.9484 |      |       |
| Standard deviation of intercept ( $\sigma_a$ )                                                                                | 371.8  |      |       |
| Standard deviation of slope ( $\sigma_b$ )                                                                                    | 527.5  |      |       |
| Residual standard deviation of calibration curve ( $\sigma_{xy}$ )                                                            | 129.2  |      |       |

**Table S16.** Results for fluoxetine obtained by RP-TLC technique using technique using silanized silica gel 60F<sub>254</sub> (RP-2) on glass plates (#1.05747) and methanol+water (10:0, v/v/v) as mobile phase.

| Amount of fluoxetine spotted onto chromatographic plate [ $\mu\text{g/spot}$ ]                                                | 1.00    | 0.90  | 0.80  |
|-------------------------------------------------------------------------------------------------------------------------------|---------|-------|-------|
| Spot area of fluoxetine [AU]                                                                                                  | 4355    | 3498  | 2324  |
|                                                                                                                               | 4599    | 3125  | 2489  |
|                                                                                                                               | 4489    | 3587  | 2189  |
| Average value of spot area of fluoxetine [AU]                                                                                 | 4481    | 3403  | 2334  |
| Standard deviation [AU]                                                                                                       | 122.2   | 245.1 | 150.2 |
| Coefficient of variation [%]                                                                                                  | 2.73    | 7.20  | 6.44  |
| <b>Parameters characterizing the calibration curve used (<math>\text{AU} = a + S \cdot x</math>) to determine LOD and LOQ</b> |         |       |       |
| Intercept ( $a$ )                                                                                                             | -6255.4 |       |       |
| Slope ( $S$ )                                                                                                                 | 10735.0 |       |       |
| Correlation coefficient                                                                                                       | 0.9862  |       |       |
| Standard deviation of intercept ( $\sigma_a$ )                                                                                | 616.1   |       |       |
| Standard deviation of slope ( $\sigma_b$ )                                                                                    | 681.8   |       |       |
| Residual standard deviation of calibration curve ( $\sigma_{xy}$ )                                                            | 166.9   |       |       |

**Table S17.** Results for fluoxetine obtained by RP-TLC technique using silica gel RP-18F<sub>254</sub> on aluminum plates (#1.05559) and methanol+water (9:1, v/v/v) as mobile phase.

| Amount of fluoxetine spotted onto chromatographic plate [ $\mu\text{g/spot}$ ]                                                | 0.60   | 0.70 | 0.80 |
|-------------------------------------------------------------------------------------------------------------------------------|--------|------|------|
| Spot area of fluoxetine [AU]                                                                                                  | 1440   | 1841 | 2245 |
|                                                                                                                               | 1645   | 1945 | 2321 |
|                                                                                                                               | 1558   | 2021 | 2199 |
| Average value of spot area of fluoxetine [AU]                                                                                 | 1548   | 1936 | 2255 |
| Standard deviation [AU]                                                                                                       | 102.9  | 90.4 | 61.6 |
| Coefficient of variation [%]                                                                                                  | 6.65   | 4.67 | 2.73 |
| <b>Parameters characterizing the calibration curve used (<math>\text{AU} = a + S \cdot x</math>) to determine LOD and LOQ</b> |        |      |      |
| Intercept ( $a$ )                                                                                                             | -562.9 |      |      |
| Slope ( $S$ )                                                                                                                 | 3536.7 |      |      |
| Correlation coefficient                                                                                                       | 0.9698 |      |      |
| Standard deviation of intercept ( $\sigma_a$ )                                                                                | 236.9  |      |      |
| Standard deviation of slope ( $\sigma_b$ )                                                                                    | 336.1  |      |      |
| Residual standard deviation of calibration curve ( $\sigma_{xy}$ )                                                            | 82.3   |      |      |

**Table S18.** Results for fluoxetine obtained by RP-TLC technique using technique using silanized silica gel 60F<sub>254</sub> (RP-2) on glass plates (#1.05747) and methanol+water (9:1, v/v/v) as mobile phase.

| Amount of fluoxetine spotted onto chromatographic plate [ $\mu\text{g/spot}$ ]                                                | 1.00    | 0.90  | 0.80  |
|-------------------------------------------------------------------------------------------------------------------------------|---------|-------|-------|
| Spot area of fluoxetine [AU]                                                                                                  | 3091    | 2649  | 1525  |
|                                                                                                                               | 3245    | 2543  | 1788  |
|                                                                                                                               | 3455    | 2388  | 1481  |
| Average value of spot area of fluoxetine [AU]                                                                                 | 3264    | 2527  | 1598  |
| Standard deviation [AU]                                                                                                       | 182.7   | 131.3 | 166.0 |
| Coefficient of variation [%]                                                                                                  | 5.60    | 5.20  | 10.39 |
| <b>Parameters characterizing the calibration curve used (<math>\text{AU} = a + S \cdot x</math>) to determine LOD and LOQ</b> |         |       |       |
| Intercept ( $a$ )                                                                                                             | -5032.7 |       |       |
| Slope ( $S$ )                                                                                                                 | 8328.3  |       |       |
| Correlation coefficient                                                                                                       | 0.9796  |       |       |
| Standard deviation of intercept ( $\sigma_a$ )                                                                                | 582.9   |       |       |
| Standard deviation of slope ( $\sigma_b$ )                                                                                    | 644.9   |       |       |
| Residual standard deviation of calibration curve ( $\sigma_{xy}$ )                                                            | 157.9   |       |       |

**Table S19.** Results for fluoxetine obtained by RP-TLC technique using silica gel RP-18F<sub>254</sub> on aluminum plates (#1.05559) and acetone+water (10:0, v/v/v) as mobile phase.

| Amount of fluoxetine spotted onto chromatographic plate [ $\mu\text{g/spot}$ ]                                                | 1.00    | 0.90  | 0.80  |
|-------------------------------------------------------------------------------------------------------------------------------|---------|-------|-------|
| Spot area of fluoxetine [AU]                                                                                                  | 2668    | 2199  | 1785  |
|                                                                                                                               | 2453    | 2045  | 1685  |
|                                                                                                                               | 2345    | 1988  | 1585  |
| Average value of spot area of fluoxetine [AU]                                                                                 | 2489    | 2077  | 1685  |
| Standard deviation [AU]                                                                                                       | 164.4   | 109.2 | 100.0 |
| Coefficient of variation [%]                                                                                                  | 6.61    | 5.25  | 5.93  |
| <b>Parameters characterizing the calibration curve used (<math>\text{AU} = a + S \cdot x</math>) to determine LOD and LOQ</b> |         |       |       |
| Intercept ( $a$ )                                                                                                             | -1532.8 |       |       |
| Slope ( $S$ )                                                                                                                 | 4018.3  |       |       |
| Correlation coefficient                                                                                                       | 0.9529  |       |       |
| Standard deviation of intercept ( $\sigma_a$ )                                                                                | 436.7   |       |       |
| Standard deviation of slope ( $\sigma_b$ )                                                                                    | 483.3   |       |       |
| Residual standard deviation of calibration curve ( $\sigma_{xy}$ )                                                            | 118.4   |       |       |

**Table S20.** Results for fluoxetine obtained by RP-TLC technique using technique using silanized silica gel 60F<sub>254</sub> (RP-2) on glass plates (#1.05747) and acetone+water (10:0, v/v/v) as mobile phase.

| Amount of fluoxetine spotted onto chromatographic plate [ $\mu\text{g/spot}$ ]                                                | 0.80   | 0.70  | 0.60  |
|-------------------------------------------------------------------------------------------------------------------------------|--------|-------|-------|
| Spot area of fluoxetine [AU]                                                                                                  | 2435   | 2161  | 1745  |
|                                                                                                                               | 2289   | 1943  | 1466  |
|                                                                                                                               | 2378   | 2002  | 1501  |
| Average value of spot area of fluoxetine [AU]                                                                                 | 2367   | 2035  | 1571  |
| Standard deviation [AU]                                                                                                       | 73.6   | 112.8 | 152.0 |
| Coefficient of variation [%]                                                                                                  | 3.11   | 5.54  | 9.68  |
| <b>Parameters characterizing the calibration curve used (<math>\text{AU} = a + S \cdot x</math>) to determine LOD and LOQ</b> |        |       |       |
| Intercept ( $a$ )                                                                                                             | -797.2 |       |       |
| Slope ( $S$ )                                                                                                                 | 3983.3 |       |       |
| Correlation coefficient                                                                                                       | 0.9553 |       |       |
| Standard deviation of intercept ( $\sigma_a$ )                                                                                | 328.5  |       |       |
| Standard deviation of slope ( $\sigma_b$ )                                                                                    | 466.1  |       |       |
| Residual standard deviation of calibration curve ( $\sigma_{xy}$ )                                                            | 114.2  |       |       |

**Table S21.** Results for fluoxetine obtained by RP-TLC technique using silica gel RP-18F<sub>254</sub> on aluminum plates (#1.05559) and acetone+water (9:1, v/v/v) as mobile phase.

| Amount of fluoxetine spotted onto chromatographic plate [ $\mu\text{g/spot}$ ]                                         | 0.90    | 0.80 | 0.70  |
|------------------------------------------------------------------------------------------------------------------------|---------|------|-------|
| Spot area of fluoxetine [AU]                                                                                           | 2456    | 2054 | 1499  |
|                                                                                                                        | 2589    | 1878 | 1648  |
|                                                                                                                        | 2312    | 1901 | 1721  |
| Average value of spot area of fluoxetine [AU]                                                                          | 2452    | 1944 | 1623  |
| Standard deviation [AU]                                                                                                | 138.5   | 95.7 | 113.1 |
| Coefficient of variation [%]                                                                                           | 5.65    | 4.92 | 6.97  |
| <b>Parameters characterizing the calibration curve used (<math>AU = a + S \cdot x</math>) to determine LOD and LOQ</b> |         |      |       |
| Intercept ( $a$ )                                                                                                      | -1312.2 |      |       |
| Slope ( $S$ )                                                                                                          | 4148.3  |      |       |
| Correlation coefficient                                                                                                | 0.9550  |      |       |
| Standard deviation of intercept ( $\sigma_a$ )                                                                         | 391.7   |      |       |
| Standard deviation of slope ( $\sigma_b$ )                                                                             | 487.1   |      |       |
| Residual standard deviation of calibration curve ( $\sigma_{xy}$ )                                                     | 119.3   |      |       |

**Table S22.** Results for fluoxetine obtained by RP-TLC technique using technique using silanized silica gel 60F<sub>254</sub> (RP-2) on glass plates (#1.05747) and acetone+water (9:1, v/v/v) as mobile phase.

| Amount of fluoxetine spotted onto chromatographic plate [ $\mu\text{g/spot}$ ]                                         | 0.90    | 0.80 | 0.70 |
|------------------------------------------------------------------------------------------------------------------------|---------|------|------|
| Spot area of fluoxetine [AU]                                                                                           | 1895    | 1569 | 1238 |
|                                                                                                                        | 2125    | 1724 | 1353 |
|                                                                                                                        | 2087    | 1623 | 1187 |
| Average value of spot area of fluoxetine [AU]                                                                          | 2036    | 1639 | 1259 |
| Standard deviation [AU]                                                                                                | 123.3   | 78.7 | 85.0 |
| Coefficient of variation [%]                                                                                           | 6.06    | 4.80 | 6.75 |
| <b>Parameters characterizing the calibration curve used (<math>AU = a + S \cdot x</math>) to determine LOD and LOQ</b> |         |      |      |
| Intercept ( $a$ )                                                                                                      | -1460.8 |      |      |
| Slope ( $S$ )                                                                                                          | 3881.7  |      |      |
| Correlation coefficient                                                                                                | 0.9697  |      |      |
| Standard deviation of intercept ( $\sigma_a$ )                                                                         | 297.3   |      |      |
| Standard deviation of slope ( $\sigma_b$ )                                                                             | 369.7   |      |      |
| Residual standard deviation of calibration curve ( $\sigma_{xy}$ )                                                     | 90.6    |      |      |

**Table S23.** Results for sertraline obtained by NP-TLC technique using silica gel 60 on glass plates (#1.05721) and chloroform + methanol + glacial acetic acid (5:4:1 v/v/v) as mobile phase.

| Amount of sertraline spotted onto chromatographic plate [ $\mu\text{g/spot}$ ]                                         | 0.40   | 0.60  | 0.80 |
|------------------------------------------------------------------------------------------------------------------------|--------|-------|------|
| Spot area of sertraline [AU]                                                                                           | 3159   | 4163  | 5346 |
|                                                                                                                        | 3015   | 3897  | 5240 |
|                                                                                                                        | 2989   | 3965  | 5189 |
| Average value of spot area of sertraline [AU]                                                                          | 3054   | 4008  | 5258 |
| Standard deviation [AU]                                                                                                | 91.6   | 138.2 | 80.1 |
| Coefficient of variation [%]                                                                                           | 3.00   | 3.45  | 1.52 |
| <b>Parameters characterizing the calibration curve used (<math>AU = a + S \cdot x</math>) to determine LOD and LOQ</b> |        |       |      |
| Intercept ( $a$ )                                                                                                      | 801.0  |       |      |
| Slope ( $S$ )                                                                                                          | 5510.0 |       |      |
| Correlation coefficient                                                                                                | 0.9924 |       |      |
| Standard deviation of intercept ( $\sigma_a$ )                                                                         | 160.3  |       |      |
| Standard deviation of slope ( $\sigma_b$ )                                                                             | 257.7  |       |      |
| Residual standard deviation of calibration curve ( $\sigma_{xy}$ )                                                     | 126.3  |       |      |

**Table S24.** Results for sertraline obtained by NP-TLC technique using silica gel 60 on glass plates (#1.05721) and chloroform + methanol + glacial acetic acid (5:4:1 v/v/v) as mobile phase.

| Amount of sertraline spotted onto chromatographic plate [ $\mu\text{g/spot}$ ]                                         | 0.40   | 0.60 | 0.80 |
|------------------------------------------------------------------------------------------------------------------------|--------|------|------|
| Spot area of sertraline [AU]                                                                                           | 4742   | 5350 | 6022 |
|                                                                                                                        | 4896   | 5422 | 5924 |
|                                                                                                                        | 4784   | 5524 | 5823 |
| Average value of spot area of sertraline [AU]                                                                          | 4807   | 5432 | 5923 |
| Standard deviation [AU]                                                                                                | 79.6   | 87.4 | 99.5 |
| Coefficient of variation [%]                                                                                           | 1.66   | 1.61 | 1.68 |
| <b>Parameters characterizing the calibration curve used (<math>AU = a + S \cdot x</math>) to determine LOD and LOQ</b> |        |      |      |
| Intercept ( $a$ )                                                                                                      | 3713.9 |      |      |
| Slope ( $S$ )                                                                                                          | 2789.2 |      |      |
| Correlation coefficient                                                                                                | 0.9851 |      |      |
| Standard deviation of intercept ( $\sigma_a$ )                                                                         | 114.2  |      |      |
| Standard deviation of slope ( $\sigma_b$ )                                                                             | 183.7  |      |      |
| Residual standard deviation of calibration curve ( $\sigma_{xy}$ )                                                     | 89.9   |      |      |

**Table S25.** Results for sertraline obtained by NP-TLC technique using mixture of silica gel 60 and kieselghur F<sub>254</sub> on aluminum plates (#1.05567) and chloroform + methanol + glacial acetic acid (5:4:1 v/v/v) as mobile phase.

| Amount of sertraline spotted onto chromatographic plate [ $\mu\text{g/spot}$ ]                                         | 0.40 | 0.60  | 0.80   |
|------------------------------------------------------------------------------------------------------------------------|------|-------|--------|
| Spot area of sertraline [AU]                                                                                           | 1931 | 3184  | 3501   |
|                                                                                                                        | 2009 | 2898  | 3622   |
|                                                                                                                        | 2089 | 3058  | 3428   |
| Average value of spot area of sertraline [AU]                                                                          | 2010 | 3047  | 3517   |
| Standard deviation [AU]                                                                                                | 79.0 | 143.3 | 98.0   |
| Coefficient of variation [%]                                                                                           | 3.93 | 4.70  | 2.79   |
| <b>Parameters characterizing the calibration curve used (<math>AU = a + S \cdot x</math>) to determine LOD and LOQ</b> |      |       |        |
| <i>Intercept (a)</i>                                                                                                   |      |       | 596.8  |
| <i>Slope (S)</i>                                                                                                       |      |       | 3768.3 |
| <i>Correlation coefficient</i>                                                                                         |      |       | 0.9674 |
| <i>Standard deviation of intercept (<math>\sigma_a</math>)</i>                                                         |      |       | 231.7  |
| <i>Standard deviation of slope (<math>\sigma_b</math>)</i>                                                             |      |       | 372.7  |
| <i>Residual standard deviation of calibration curve (<math>\sigma_{xy}</math>)</i>                                     |      |       | 182.6  |

**Table S26.** Results for sertraline obtained by NP-TLC technique using silica gel 60F<sub>254</sub> on glass plates (#1.05715) and acetone + toluene + ammonia (10:9:1, v/v/v) as mobile phase.

| Amount of sertraline spotted onto chromatographic plate [ $\mu\text{g/spot}$ ]                                         | 0.40 | 0.60  | 0.80   |
|------------------------------------------------------------------------------------------------------------------------|------|-------|--------|
| Spot area of sertraline [AU]                                                                                           | 2361 | 3281  | 3919   |
|                                                                                                                        | 2274 | 3482  | 3876   |
|                                                                                                                        | 2385 | 3321  | 3985   |
| Average value of spot area of sertraline [AU]                                                                          | 2340 | 3361  | 3927   |
| Standard deviation [AU]                                                                                                | 58.4 | 106.4 | 54.9   |
| Coefficient of variation [%]                                                                                           | 2.50 | 3.17  | 1.40   |
| <b>Parameters characterizing the calibration curve used (<math>AU = a + S \cdot x</math>) to determine LOD and LOQ</b> |      |       |        |
| <i>Intercept (a)</i>                                                                                                   |      |       | 829.3  |
| <i>Slope (S)</i>                                                                                                       |      |       | 3966.7 |
| <i>Correlation coefficient</i>                                                                                         |      |       | 0.9820 |
| <i>Standard deviation of intercept (<math>\sigma_a</math>)</i>                                                         |      |       | 179.2  |
| <i>Standard deviation of slope (<math>\sigma_b</math>)</i>                                                             |      |       | 288.1  |
| <i>Residual standard deviation of calibration curve (<math>\sigma_{xy}</math>)</i>                                     |      |       | 141.2  |

**Table S27.** Results for sertraline obtained by NP-TLC technique using silica gel 60 on glass plates (#1.05721) and acetone + toluene + ammonia (10:9:1, v/v/v) as mobile phase.

| Amount of sertraline spotted onto chromatographic plate [ $\mu\text{g/spot}$ ]                                         | 0.40   | 0.60  | 0.80  |
|------------------------------------------------------------------------------------------------------------------------|--------|-------|-------|
| Spot area of sertraline [AU]                                                                                           | 2962   | 4643  | 5977  |
|                                                                                                                        | 3254   | 4368  | 6224  |
|                                                                                                                        | 3125   | 4510  | 6325  |
| Average value of spot area of sertraline [AU]                                                                          | 3114   | 4507  | 6175  |
| Standard deviation [AU]                                                                                                | 146.3  | 137.5 | 179.0 |
| Coefficient of variation [%]                                                                                           | 4.70   | 3.05  | 2.90  |
| <b>Parameters characterizing the calibration curve used (<math>AU = a + S \cdot x</math>) to determine LOD and LOQ</b> |        |       |       |
| Intercept ( $a$ )                                                                                                      | 6.2    |       |       |
| Slope ( $S$ )                                                                                                          | 7654.2 |       |       |
| Correlation coefficient                                                                                                | 0.9936 |       |       |
| Standard deviation of intercept ( $\sigma_a$ )                                                                         | 204.9  |       |       |
| Standard deviation of slope ( $\sigma_b$ )                                                                             | 329.7  |       |       |
| Residual standard deviation of calibration curve ( $\sigma_{xy}$ )                                                     | 161.5  |       |       |

**Table S28.** Results for sertraline obtained by NP-TLC technique using mixture of silica gel 60 and kieselghur F<sub>254</sub> on aluminum plates (#1.05567) and acetone + toluene + ammonia (10:9:1, v/v/v) as mobile phase.

| Amount of sertraline spotted onto chromatographic plate [ $\mu\text{g/spot}$ ]                                         | 0.40   | 0.60 | 0.80  |
|------------------------------------------------------------------------------------------------------------------------|--------|------|-------|
| Spot area of sertraline [AU]                                                                                           | 2969   | 3203 | 4122  |
|                                                                                                                        | 2788   | 3005 | 3922  |
|                                                                                                                        | 2945   | 3125 | 4026  |
| Average value of spot area of sertraline [AU]                                                                          | 2901   | 3111 | 4023  |
| Standard deviation [AU]                                                                                                | 98.3   | 99.7 | 100.0 |
| Coefficient of variation [%]                                                                                           | 3.39   | 3.21 | 2.49  |
| <b>Parameters characterizing the calibration curve used (<math>AU = a + S \cdot x</math>) to determine LOD and LOQ</b> |        |      |       |
| Intercept ( $a$ )                                                                                                      | 1661.0 |      |       |
| Slope ( $S$ )                                                                                                          | 2806.7 |      |       |
| Correlation coefficient                                                                                                | 0.9278 |      |       |
| Standard deviation of intercept ( $\sigma_a$ )                                                                         | 265.2  |      |       |
| Standard deviation of slope ( $\sigma_b$ )                                                                             | 426.5  |      |       |
| Residual standard deviation of calibration curve ( $\sigma_{xy}$ )                                                     | 208.9  |      |       |



**Table S29.** Results for sertraline obtained by NP-TLC technique using silanized silica gel 60F<sub>254</sub> (RP-2) on glass plates (#1.05747) and acetone + toluene + ammonia (10:9:1, v/v/v) as mobile phase.

| Amount of sertraline spotted onto chromatographic plate [ $\mu\text{g/spot}$ ]                                                | 0.40   | 0.60 | 0.80 |
|-------------------------------------------------------------------------------------------------------------------------------|--------|------|------|
| Spot area of sertraline [AU]                                                                                                  | 2158   | 3629 | 4499 |
|                                                                                                                               | 2549   | 3743 | 4551 |
|                                                                                                                               | 2345   | 3721 | 4602 |
| Average value of spot area of sertraline [AU]                                                                                 | 2351   | 3698 | 4551 |
| Standard deviation [AU]                                                                                                       | 195.6  | 60.5 | 51.5 |
| Coefficient of variation [%]                                                                                                  | 8.32   | 1.64 | 1.13 |
| <b>Parameters characterizing the calibration curve used (<math>\text{AU} = a + S \cdot x</math>) to determine LOD and LOQ</b> |        |      |      |
| Intercept ( $a$ )                                                                                                             | 233.0  |      |      |
| Slope ( $S$ )                                                                                                                 | 5500.0 |      |      |
| Correlation coefficient                                                                                                       | 0.9858 |      |      |
| Standard deviation of intercept ( $\sigma_a$ )                                                                                | 220.4  |      |      |
| Standard deviation of slope ( $\sigma_b$ )                                                                                    | 354.5  |      |      |
| Residual standard deviation of calibration curve ( $\sigma_{xy}$ )                                                            | 173.7  |      |      |

**Table S30.** Results for sertraline obtained by RP-TLC technique using silica gel RP-18F<sub>254</sub> on aluminum plates (#1.05559) and methanol+water (10:0, v/v/v) as mobile phase.

| Amount of sertraline spotted onto chromatographic plate [ $\mu\text{g/spot}$ ]                                                | 0.60    | 0.40  | 0.20 |
|-------------------------------------------------------------------------------------------------------------------------------|---------|-------|------|
| Spot area of sertraline [AU]                                                                                                  | 6890    | 4937  | 3048 |
|                                                                                                                               | 7388    | 4703  | 2890 |
|                                                                                                                               | 6954    | 4825  | 2978 |
| Average value of spot area of sertraline [AU]                                                                                 | 7077    | 4822  | 2972 |
| Standard deviation [AU]                                                                                                       | 270.9   | 117.0 | 79.2 |
| Coefficient of variation [%]                                                                                                  | 3.83    | 2.43  | 2.66 |
| <b>Parameters characterizing the calibration curve used (<math>\text{AU} = a + S \cdot x</math>) to determine LOD and LOQ</b> |         |       |      |
| Intercept ( $a$ )                                                                                                             | 851.7   |       |      |
| Slope ( $S$ )                                                                                                                 | 10263.3 |       |      |
| Correlation coefficient                                                                                                       | 0.9947  |       |      |
| Standard deviation of intercept ( $\sigma_a$ )                                                                                | 172.9   |       |      |
| Standard deviation of slope ( $\sigma_b$ )                                                                                    | 400.3   |       |      |
| Residual standard deviation of calibration curve ( $\sigma_{xy}$ )                                                            | 196.1   |       |      |

**Table S31.** Results for sertraline obtained by RP-TLC technique using technique using silanized silica gel 60F<sub>254</sub> (RP-2) on glass plates (#1.05747) and methanol+water (10:0, v/v/v) as mobile phase.

| Amount of sertraline spotted onto chromatographic plate [ $\mu\text{g/spot}$ ]                                         | 0.60 | 0.40 | 0.20   |
|------------------------------------------------------------------------------------------------------------------------|------|------|--------|
| Spot area of sertraline [AU]                                                                                           | 4990 | 3657 | 1992   |
|                                                                                                                        | 4978 | 3699 | 1648   |
|                                                                                                                        | 4928 | 3771 | 1687   |
| Average value of spot area of sertraline [AU]                                                                          | 4965 | 3709 | 1776   |
| Standard deviation [AU]                                                                                                | 32.9 | 57.7 | 188.4  |
| Coefficient of variation [%]                                                                                           | 0.66 | 1.55 | 10.61  |
| <b>Parameters characterizing the calibration curve used (<math>AU = a + S \cdot x</math>) to determine LOD and LOQ</b> |      |      |        |
| Intercept ( $a$ )                                                                                                      |      |      | 293.7  |
| Slope ( $S$ )                                                                                                          |      |      | 7974.2 |
| Correlation coefficient                                                                                                |      |      | 0.9900 |
| Standard deviation of intercept ( $\sigma_a$ )                                                                         |      |      | 185.3  |
| Standard deviation of slope ( $\sigma_b$ )                                                                             |      |      | 428.8  |
| Residual standard deviation of calibration curve ( $\sigma_{xy}$ )                                                     |      |      | 210.1  |

**Table S32.** Results for sertraline obtained by RP-TLC technique using silica gel RP-18F<sub>254</sub> on aluminum plates (#1.05559) and methanol+water (9:1, v/v/v) as mobile phase.

| Amount of sertraline spotted onto chromatographic plate [ $\mu\text{g/spot}$ ]                                         | 0.60  | 0.40  | 0.20   |
|------------------------------------------------------------------------------------------------------------------------|-------|-------|--------|
| Spot area of sertraline [AU]                                                                                           | 5079  | 3622  | 1782   |
|                                                                                                                        | 5427  | 3458  | 1778   |
|                                                                                                                        | 5444  | 4205  | 1807   |
| Average value of spot area of sertraline [AU]                                                                          | 5317  | 3762  | 1789   |
| Standard deviation [AU]                                                                                                | 206.0 | 392.6 | 15.7   |
| Coefficient of variation [%]                                                                                           | 3.87  | 10.44 | 0.88   |
| <b>Parameters characterizing the calibration curve used (<math>AU = a + S \cdot x</math>) to determine LOD and LOQ</b> |       |       |        |
| Intercept ( $a$ )                                                                                                      |       |       | 94.8   |
| Slope ( $S$ )                                                                                                          |       |       | 8819.2 |
| Correlation coefficient                                                                                                |       |       | 0.9874 |
| Standard deviation of intercept ( $\sigma_a$ )                                                                         |       |       | 231.2  |
| Standard deviation of slope ( $\sigma_b$ )                                                                             |       |       | 535.0  |
| Residual standard deviation of calibration curve ( $\sigma_{xy}$ )                                                     |       |       | 262.1  |

**Table S33.** Results for sertraline obtained by RP-TLC technique using technique using silanized silica gel 60F<sub>254</sub> (RP-2) on glass plates (#1.05747) and methanol+water (9:1, v/v/v) as mobile phase.

| Amount of sertraline spotted onto chromatographic plate [ $\mu\text{g/spot}$ ]                                         | 0.60 | 0.40 | 0.20   |
|------------------------------------------------------------------------------------------------------------------------|------|------|--------|
| Spot area of sertraline [AU]                                                                                           | 5468 | 3888 | 2068   |
|                                                                                                                        | 5609 | 3944 | 1883   |
|                                                                                                                        | 5498 | 3829 | 1925   |
| Average value of spot area of sertraline [AU]                                                                          | 5525 | 3887 | 1959   |
| Standard deviation [AU]                                                                                                | 74.3 | 57.5 | 97.0   |
| Coefficient of variation [%]                                                                                           | 1.34 | 1.48 | 4.95   |
| <b>Parameters characterizing the calibration curve used (<math>AU = a + S \cdot x</math>) to determine LOD and LOQ</b> |      |      |        |
| Intercept ( $a$ )                                                                                                      |      |      | 223.9  |
| Slope ( $S$ )                                                                                                          |      |      | 8915.8 |
| Correlation coefficient                                                                                                |      |      | 0.9979 |
| Standard deviation of intercept ( $\sigma_a$ )                                                                         |      |      | 93.5   |
| Standard deviation of slope ( $\sigma_b$ )                                                                             |      |      | 216.3  |
| Residual standard deviation of calibration curve ( $\sigma_{xy}$ )                                                     |      |      | 106.0  |

**Table S34.** Results for sertraline obtained by RP-TLC technique using silica gel RP-18F<sub>254</sub> on aluminum plates (#1.05559) and acetone+water (10:0, v/v/v) as mobile phase.

| Amount of sertraline spotted onto chromatographic plate [ $\mu\text{g/spot}$ ]                                         | 0.60  | 0.40  | 0.20   |
|------------------------------------------------------------------------------------------------------------------------|-------|-------|--------|
| Spot area of sertraline [AU]                                                                                           | 6367  | 5662  | 4728   |
|                                                                                                                        | 6594  | 5511  | 4385   |
|                                                                                                                        | 6625  | 5871  | 4084   |
| Average value of spot area of sertraline [AU]                                                                          | 6529  | 5681  | 4399   |
| Standard deviation [AU]                                                                                                | 140.9 | 180.8 | 322.2  |
| Coefficient of variation [%]                                                                                           | 2.16  | 3.18  | 7.33   |
| <b>Parameters characterizing the calibration curve used (<math>AU = a + S \cdot x</math>) to determine LOD and LOQ</b> |       |       |        |
| Intercept ( $a$ )                                                                                                      |       |       | 3406.7 |
| Slope ( $S$ )                                                                                                          |       |       | 5324.2 |
| Correlation coefficient                                                                                                |       |       | 0.9713 |
| Standard deviation of intercept ( $\sigma_a$ )                                                                         |       |       | 212.7  |
| Standard deviation of slope ( $\sigma_b$ )                                                                             |       |       | 492.4  |
| Residual standard deviation of calibration curve ( $\sigma_{xy}$ )                                                     |       |       | 241.2  |

**Table S35.** Results for sertraline obtained by RP-TLC technique using technique using silanized silica gel 60F<sub>254</sub> (RP-2) on glass plates (#1.05747) and acetone+water (10:0, v/v/v) as mobile phase.

| Amount of sertraline spotted onto chromatographic plate [ $\mu\text{g/spot}$ ]                                         | 0.60   | 0.40  | 0.20  |
|------------------------------------------------------------------------------------------------------------------------|--------|-------|-------|
| Spot area of sertraline [AU]                                                                                           | 5897   | 4421  | 1985  |
|                                                                                                                        | 5523   | 4366  | 2151  |
|                                                                                                                        | 5654   | 4021  | 1888  |
| Average value of spot area of sertraline [AU]                                                                          | 5691   | 4269  | 2008  |
| Standard deviation [AU]                                                                                                | 189.8  | 216.8 | 133.0 |
| Coefficient of variation [%]                                                                                           | 3.33   | 5.08  | 6.62  |
| <b>Parameters characterizing the calibration curve used (<math>AU = a + S \cdot x</math>) to determine LOD and LOQ</b> |        |       |       |
| Intercept ( $a$ )                                                                                                      | 306.2  |       |       |
| Slope ( $S$ )                                                                                                          | 9208.3 |       |       |
| Correlation coefficient                                                                                                | 0.9867 |       |       |
| Standard deviation of intercept ( $\sigma_a$ )                                                                         | 248.0  |       |       |
| Standard deviation of slope ( $\sigma_b$ )                                                                             | 574.1  |       |       |
| Residual standard deviation of calibration curve ( $\sigma_{xy}$ )                                                     | 281.2  |       |       |

**Table S36.** Results for sertraline obtained by RP-TLC technique using silica gel RP-18F<sub>254</sub> on aluminum plates (#1.05559) and acetone+water (9:1, v/v/v) as mobile phase.

| Amount of sertraline spotted onto chromatographic plate [ $\mu\text{g/spot}$ ]                                         | 0.60   | 0.40  | 0.20  |
|------------------------------------------------------------------------------------------------------------------------|--------|-------|-------|
| Spot area of sertraline [AU]                                                                                           | 6293   | 4864  | 3932  |
|                                                                                                                        | 5653   | 5125  | 3721  |
|                                                                                                                        | 5777   | 5087  | 4027  |
| Average value of spot area of sertraline [AU]                                                                          |        | 5025  | 3893  |
| Standard deviation [AU]                                                                                                | 339.4  | 141.0 | 156.6 |
| Coefficient of variation [%]                                                                                           | 5.75   | 2.81  | 4.02  |
| <b>Parameters characterizing the calibration curve used (<math>AU = a + S \cdot x</math>) to determine LOD and LOQ</b> |        |       |       |
| Intercept ( $a$ )                                                                                                      | 2927.8 |       |       |
| Slope ( $S$ )                                                                                                          | 5035.8 |       |       |
| Correlation coefficient                                                                                                | 0.9724 |       |       |
| Standard deviation of intercept ( $\sigma_a$ )                                                                         | 197.3  |       |       |
| Standard deviation of slope ( $\sigma_b$ )                                                                             | 456.7  |       |       |
| Residual standard deviation of calibration curve ( $\sigma_{xy}$ )                                                     | 223.7  |       |       |

**Table S37.** Results for sertraline obtained by RP-TLC technique using technique using silanized silica gel 60F<sub>254</sub> (RP-2) on glass plates (#1.05747) and acetone+water (9:1, v/v/v) as mobile phase.

| Amount of sertraline spotted onto chromatographic plate [ $\mu\text{g/spot}$ ]                                                | 0.80   | 0.60  | 0.40  |
|-------------------------------------------------------------------------------------------------------------------------------|--------|-------|-------|
| Spot area of sertraline [AU]                                                                                                  | 7524   | 5267  | 4249  |
|                                                                                                                               | 7245   | 5907  | 3825  |
|                                                                                                                               | 7356   | 6055  | 4082  |
| Average value of spot area of sertraline [AU]                                                                                 | 7375   | 5743  | 4052  |
| Standard deviation [AU]                                                                                                       | 140.5  | 418.8 | 213.6 |
| Coefficient of variation [%]                                                                                                  | 1.90   | 7.29  | 5.27  |
| <b>Parameters characterizing the calibration curve used (<math>\text{AU} = a + S \cdot x</math>) to determine LOD and LOQ</b> |        |       |       |
| Intercept ( $a$ )                                                                                                             | 738.8  |       |       |
| Slope ( $S$ )                                                                                                                 | 8307.5 |       |       |
| Correlation coefficient                                                                                                       | 0.9857 |       |       |
| Standard deviation of intercept ( $\sigma_a$ )                                                                                | 333.5  |       |       |
| Standard deviation of slope ( $\sigma_b$ )                                                                                    | 536.3  |       |       |
| Residual standard deviation of calibration curve ( $\sigma_{xy}$ )                                                            | 262.8  |       |       |

**Table S38.** Detection limit values and  $R_F$  values for fluoxetine obtained in different chromatographic systems.

| Symbol of mobile phase | Number of plates | $R_F$ value | LOD [ $\mu\text{g}/\text{spot}$ ] calculated with |                   | Average LOD value [ $\mu\text{g}/\text{spot}$ ] |
|------------------------|------------------|-------------|---------------------------------------------------|-------------------|-------------------------------------------------|
|                        |                  |             | ( $\sigma_a$ )                                    | ( $\sigma_{xy}$ ) |                                                 |
| <b>A</b>               | 1.05715          | 0.56        | 0.172                                             | 0.060             | 0.116                                           |
|                        | 1.05721          | 0.65        | 0.136                                             | 0.041             | 0.089                                           |
|                        | 1.05567          | 0.80        | 0.313                                             | 0.084             | 0.199                                           |
|                        | 1.05747          | 0.84        | 0.221                                             | 0.067             | 0.144                                           |
| <b>B</b>               | 1.05715          | 0.55        | 0.220                                             | 0.076             | 0.148                                           |
|                        | 1.05721          | 0.53        | 0.207                                             | 0.072             | 0.140                                           |
|                        | 1.05567          | 0.65        | 0.161                                             | 0.056             | 0.109                                           |
|                        | 1.05747          | 0.92        | 0.279                                             | 0.097             | 0.188                                           |
| <b>C</b>               | 1.05715          | 0.23        | 0.312                                             | 0.109             | 0.211                                           |
|                        | 1.05721          | 0.24        | 0.191                                             | 0.066             | 0.129                                           |
|                        | 1.05567          | 0.48        | 0.306                                             | 0.106             | 0.206                                           |
|                        | 1.05747          | 0.65        | 0.098                                             | 0.034             | 0.066                                           |
| <b>D</b>               | 1.05559          | 0.40        | 0.294                                             | 0.102             | 0.198                                           |
|                        | 1.05747          | 0.51        | 0.189                                             | 0.051             | 0.120                                           |
| <b>E</b>               | 1.05559          | 0.38        | 0.221                                             | 0.077             | 0.149                                           |
|                        | 1.05747          | 0.28        | 0.231                                             | 0.063             | 0.147                                           |
| <b>F</b>               | 1.05559          | 0.07        | 0.359                                             | 0.097             | 0.228                                           |
|                        | 1.05747          | 0.11        | 0.272                                             | 0.095             | 0.184                                           |
| <b>G</b>               | 1.05559          | 0.42        | 0.312                                             | 0.095             | 0.204                                           |
|                        | 1.05747          | 0.23        | 0.253                                             | 0.077             | 0.165                                           |

**Mobile phases:** **A** chloroform + methanol + ammonia- 9:1:0.4 (v/v/v); **B**- chloroform + methanol + glacial acetic acid- 5:4:1 (v/v/v); **C**- acetone + toluene + ammonia- 10:9:1 (v/v/v); **D**- methanol + water 10:0 (v/v); **E**- methanol + water 9:1 (v/v); **F**- acetone + water 10:0 (v/v); **G**- acetone + water - 9:1 (v/v).  
**Chromatographic plates:** 1.05715 – silica gel 60 F<sub>254</sub> on glass plates; 1.05721 silica gel 60 on glass plates; 1.05567 – mixture of silica gel 60 and kieselghur F<sub>254</sub> on aluminium plates; 1.05747 – silanized silica gel 60F<sub>254</sub> (RP-2) on glass plates; 1.05559 – silica gel RP-18F<sub>254</sub> on aluminium plates

**Table S39.** Detection limit values and  $R_F$  values for sertraline obtained in different chromatographic systems.

| Symbol of mobile phase | Number of plates | $R_F$ value                                   | LOD [ $\mu\text{g}/\text{spot}$ ] calculated with |                   | Average LOD value [ $\mu\text{g}/\text{spot}$ ] |
|------------------------|------------------|-----------------------------------------------|---------------------------------------------------|-------------------|-------------------------------------------------|
|                        |                  |                                               | ( $\sigma_a$ )                                    | ( $\sigma_{xy}$ ) |                                                 |
| <b>B</b>               | 1.05715          | 0.44                                          | 0.096                                             | 0.076             | 0.086                                           |
|                        | 1.05721          | 0.74                                          | 0.135                                             | 0.105             | 0.120                                           |
|                        | 1.05567          | 0.68                                          | 0.202                                             | 0.160             | 0.181                                           |
|                        | 1.05747          | Sertraline migrate with front of mobile phase |                                                   |                   |                                                 |
| <b>C</b>               | 1.05715          | 0.67                                          | 0.150                                             | 0.117             | 0.134                                           |
|                        | 1.05721          | 0.63                                          | 0.088                                             | 0.070             | 0.079                                           |
|                        | 1.05567          | 0.78                                          | 0.312                                             | 0.245             | 0.279                                           |
|                        | 1.05747          | 0.92                                          | 0.132                                             | 0.104             | 0.118                                           |
| <b>D</b>               | 1.05559          | 0.26                                          | 0.056                                             | 0.063             | 0.060                                           |
|                        | 1.05747          | 0.67                                          | 0.077                                             | 0.087             | 0.082                                           |
| <b>E</b>               | 1.05559          | 0.25                                          | 0.086                                             | 0.098             | 0.092                                           |
|                        | 1.05747          | 0.40                                          | 0.035                                             | 0.039             | 0.037                                           |
| <b>F</b>               | 1.05559          | 0.16                                          | 0.132                                             | 0.149             | 0.141                                           |
|                        | 1.05747          | 0.34                                          | 0.088                                             | 0.100             | 0.094                                           |
| <b>G</b>               | 1.05559          | 0.40                                          | 0.129                                             | 0.146             | 0.138                                           |
|                        | 1.05747          | 0.35                                          | 0.132                                             | 0.104             | 0.118                                           |

**Mobile phases:** **B**- chloroform + methanol + glacial acetic acid- 5:4:1 (v/v/v); **C**- acetone + toluene + ammonia- 10:9:1 (v/v/v); **D**- methanol + water 10:0 (v/v); **E**- methanol + water 9:1 (v/v); **F**- acetone + water 10:0 (v/v); **G**- acetone + water - 9:1 (v/v).

**Chromatographic plates:** 1.05715 – silica gel 60 F<sub>254</sub> on glass plates; 1.05721 silica gel 60 on glass plates; 1.05567 – mixture of silica gel 60 and kieselghur F<sub>254</sub> on aluminium plates; 1.05747 – silanized silica gel 60F<sub>254</sub> (RP-2) on glass plates; 1.05559 – silica gel RP-18F<sub>254</sub> on aluminium plates

**Table S40.** Quantification limit values for fluoxetine obtained in different chromatographic systems.

| Symbol of mobile phase | Number of plates | LOQ [ $\mu\text{g}/\text{spot}$ ] calculated with |                   | Average LOQ value [ $\mu\text{g}/\text{spot}$ ] |
|------------------------|------------------|---------------------------------------------------|-------------------|-------------------------------------------------|
|                        |                  | ( $\sigma_a$ )                                    | ( $\sigma_{xy}$ ) |                                                 |
| <b>A</b>               | 1.05715          | 0.522                                             | 0.181             | 0.352                                           |
|                        | 1.05721          | 0.413                                             | 0.126             | 0.269                                           |
|                        | 1.05567          | 0.949                                             | 0.257             | 0.603                                           |
|                        | 1.05747          | 0.669                                             | 0.204             | 0.436                                           |
| <b>B</b>               | 1.05715          | 0.666                                             | 0.232             | 0.449                                           |
|                        | 1.05721          | 0.627                                             | 0.218             | 0.422                                           |
|                        | 1.05567          | 0.488                                             | 0.170             | 0.329                                           |
|                        | 1.05747          | 0.846                                             | 0.294             | 0.570                                           |
| <b>C</b>               | 1.05715          | 0.948                                             | 0.329             | 0.639                                           |
|                        | 1.05721          | 0.578                                             | 0.201             | 0.389                                           |
|                        | 1.05567          | 0.928                                             | 0.323             | 0.625                                           |
|                        | 1.05747          | 0.296                                             | 0.103             | 0.199                                           |
| <b>D</b>               | 1.05559          | 0.891                                             | 0.310             | 0.600                                           |
|                        | 1.05747          | 0.574                                             | 0.156             | 0.365                                           |
| <b>E</b>               | 1.05559          | 0.670                                             | 0.233             | 0.451                                           |
|                        | 1.05747          | 0.700                                             | 0.190             | 0.445                                           |
| <b>F</b>               | 1.05559          | 1.087                                             | 0.295             | 0.691                                           |
|                        | 1.05747          | 0.825                                             | 0.287             | 0.556                                           |
| <b>G</b>               | 1.05559          | 0.944                                             | 0.288             | 0.616                                           |
|                        | 1.05747          | 0.766                                             | 0.233             | 0.500                                           |

**Mobile phases:** **A** chloroform + methanol + ammonia- 9:1:0.4 (v/v/v); **B**- chloroform + methanol + glacial acetic acid- 5:4:1 (v/v/v); **C**- acetone + toluene + ammonia- 10:9:1 (v/v/v); **D**- methanol + water 10:0 (v/v); **E**- methanol + water 9:1 (v/v); **F**- acetone + water 10:0 (v/v); **G**- acetone + water - 9:1 (v/v).

**Chromatographic plates:** 1.05715 – silica gel 60 F<sub>254</sub> on glass plates; 1.05721 silica gel 60 on glass plates; 1.05567 – mixture of silica gel 60 and kieselghur F<sub>254</sub> on aluminium plates; 1.05747 – silanized silica gel 60F<sub>254</sub> (RP-2) on glass plates; 1.05559 – silica gel RP-18F<sub>254</sub> on aluminium plates



**Table S41.** Quantification limit values for sertraline obtained in different chromatographic systems.

| Symbol of mobile phase | Number of plates | LOQ [ $\mu\text{g}/\text{spot}$ ] calculated with |                   | Average LOQ value [ $\mu\text{g}/\text{spot}$ ] |
|------------------------|------------------|---------------------------------------------------|-------------------|-------------------------------------------------|
|                        |                  | ( $\sigma_a$ )                                    | ( $\sigma_{xy}$ ) |                                                 |
| <b>B</b>               | 1.05715          | 0.291                                             | 0.229             | 0.260                                           |
|                        | 1.05721          | 0.410                                             | 0.323             | 0.366                                           |
|                        | 1.05567          | 0.615                                             | 0.484             | 0.550                                           |
|                        | 1.05747          | -                                                 | -                 | -                                               |
| <b>C</b>               | 1.05715          | 0.452                                             | 0.356             | 0.404                                           |
|                        | 1.05721          | 0.268                                             | 0.211             | 0.239                                           |
|                        | 1.05567          | 0.945                                             | 0.744             | 0.845                                           |
|                        | 1.05747          | 0.401                                             | 0.316             | 0.358                                           |
| <b>D</b>               | 1.05559          | 0.169                                             | 0.191             | 0.180                                           |
|                        | 1.05747          | 0.232                                             | 0.263             | 0.248                                           |
| <b>E</b>               | 1.05559          | 0.262                                             | 0.297             | 0.280                                           |
|                        | 1.05747          | 0.105                                             | 0.119             | 0.112                                           |
| <b>F</b>               | 1.05559          | 0.400                                             | 0.453             | 0.426                                           |
|                        | 1.05747          | 0.269                                             | 0.305             | 0.287                                           |
| <b>G</b>               | 1.05559          | 0.392                                             | 0.444             | 0.418                                           |
|                        | 1.05747          | 0.401                                             | 0.316             | 0.359                                           |

**Mobile phases:** **B**- chloroform + methanol + glacial acetic acid- 5:4:1 (v/v/v); **C**- acetone + toluene + ammonia- 10:9:1 (v/v/v); **D**- methanol + water 10:0 (v/v); **E**- methanol + water 9:1 (v/v); **F**- acetone + water 10:0 (v/v); **G**- acetone + water - 9:1 (v/v).

**Chromatographic plates:** 1.05715 – silica gel 60 F<sub>254</sub> on glass plates; 1.05721 silica gel 60 on glass plates; 1.05567 – mixture of silica gel 60 and kieselghur F<sub>254</sub> on aluminium plates; 1.05747 – silanized silica gel 60F<sub>254</sub> (RP-2) on glass plates; 1.05559 – silica gel RP-18F<sub>254</sub> on aluminium plates

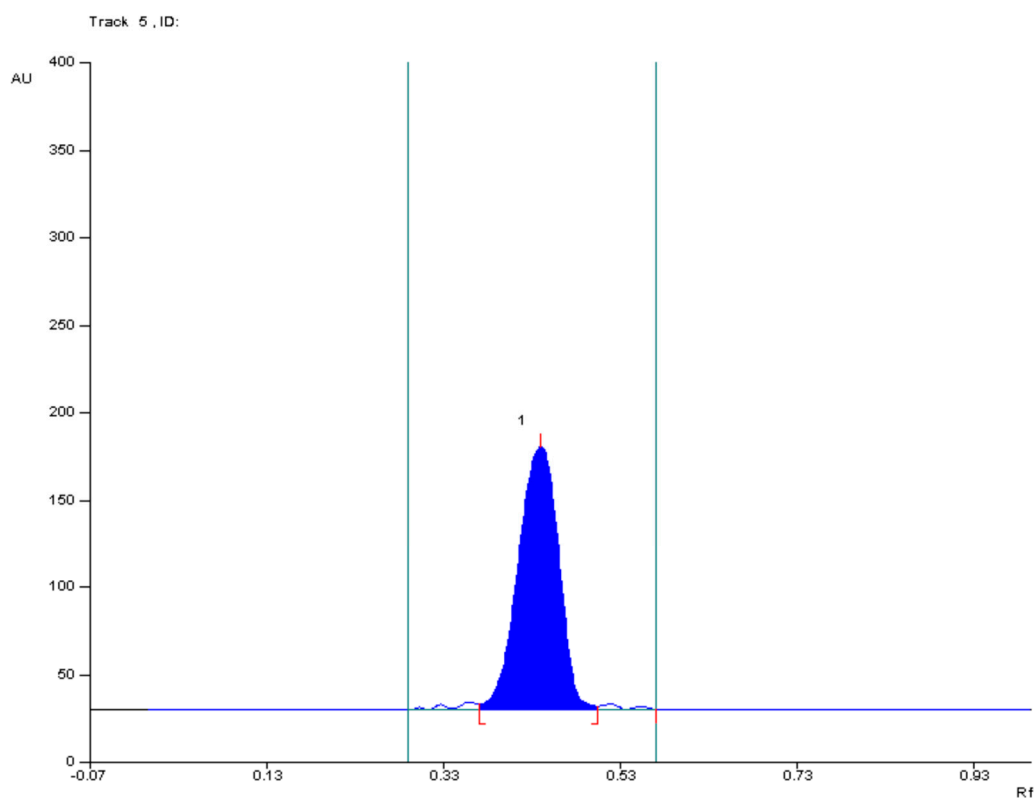

**Figure S3.** Densitogram of sertraline analyzed on silica gel 60 F<sub>254</sub> (1.05715) using chloroform + methanol + glacial acetic acid- 5:4:1 (v/v/v) mobile phase.

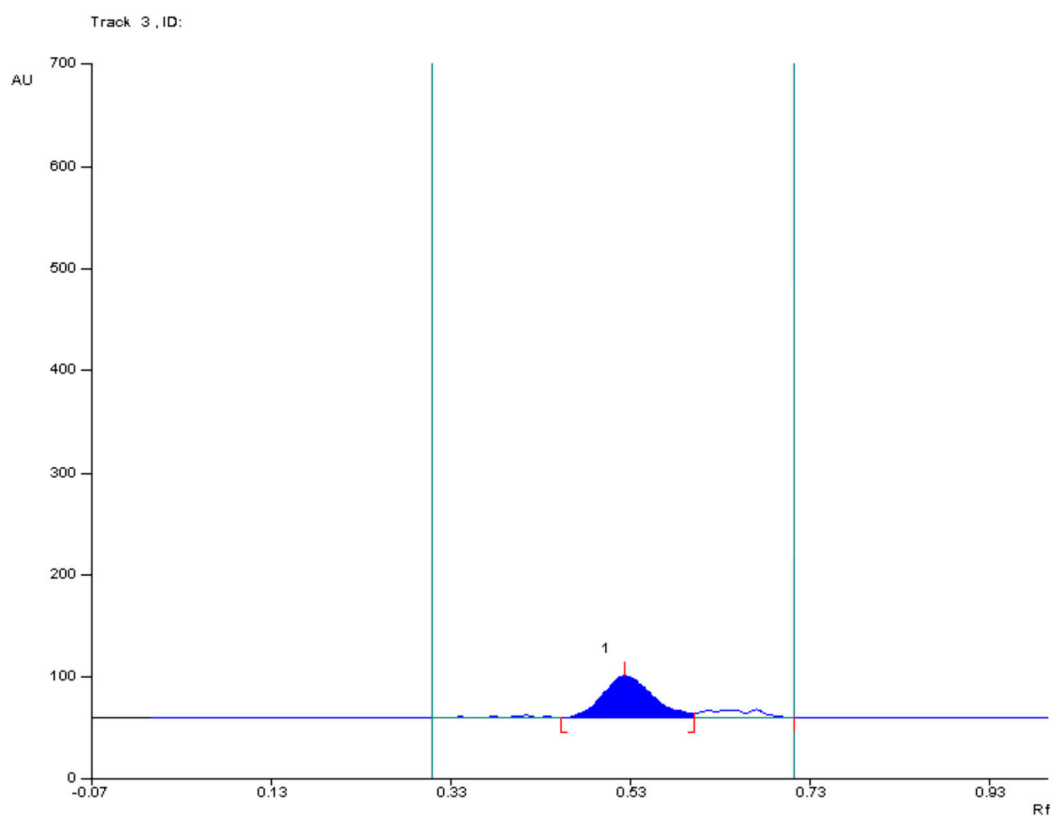

**Figure S4.** Densitogram of fluoxetine analyzed on silica gel 60 F<sub>254</sub> (1.05715) using chloroform + methanol + glacial acetic acid- 5:4:1 (v/v/v) mobile phase.

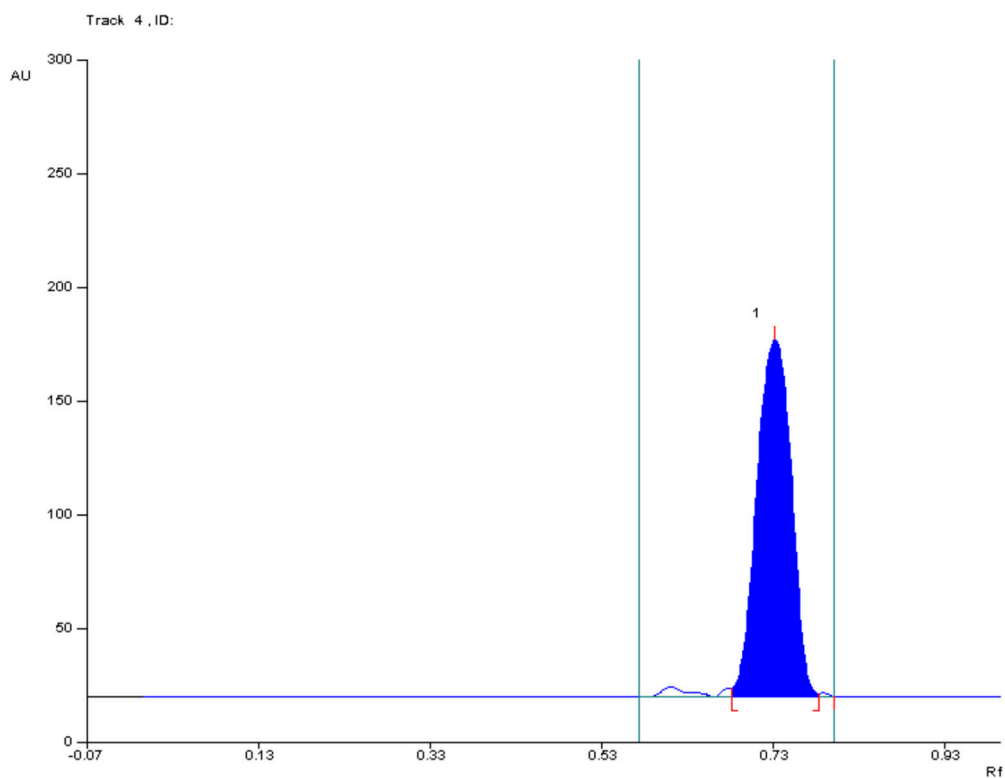

**Figure S5.** Densitogram of sertraline analyzed on silica gel 60 (1.05721) using chloroform + methanol + glacial acetic acid- 5:4:1 (v/v/v) mobile phase.

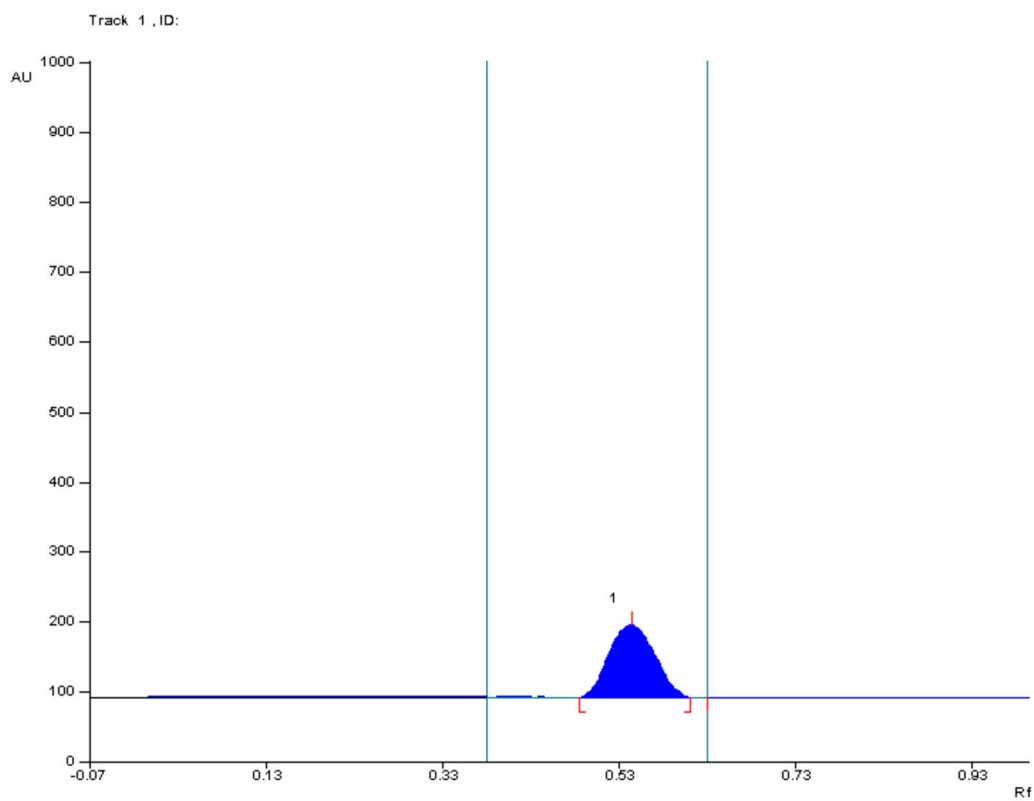

**Figure S6.** Densitogram of fluoxetine analyzed on silica gel 60 (1.05721) using chloroform + methanol + glacial acetic acid- 5:4:1 (v/v/v) mobile phase.

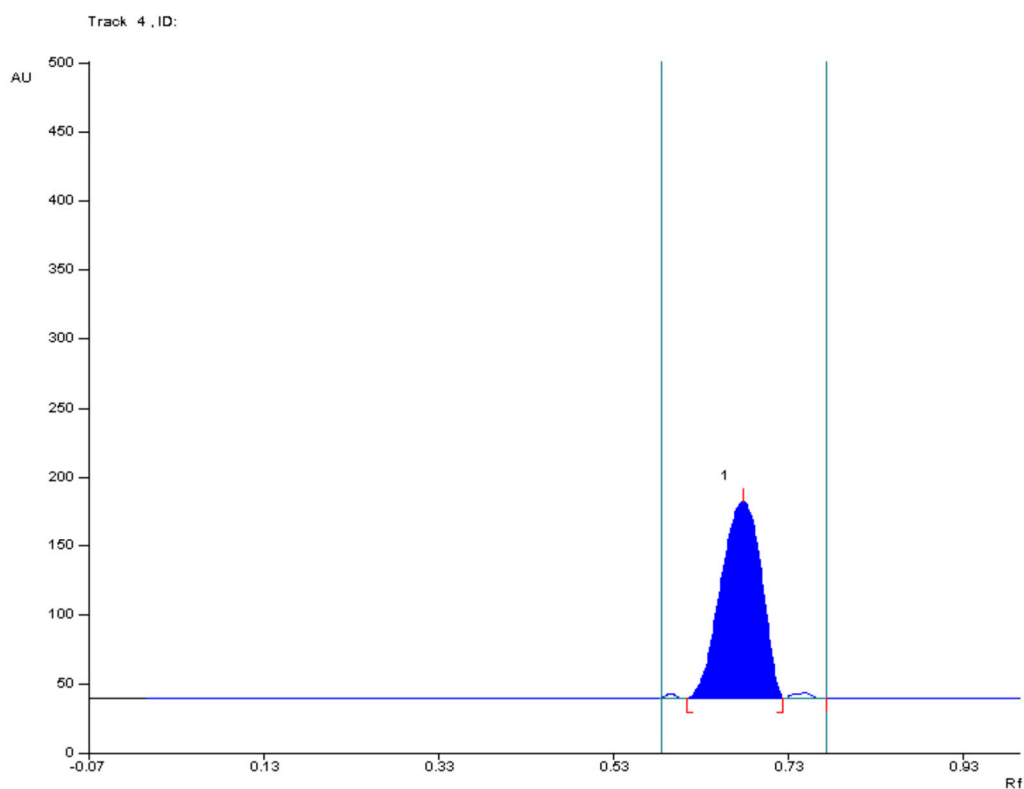

**Figure S7.** Densitogram of sertraline analyzed on mixture of silica gel 60 and kieselghur F<sub>254</sub> (1.05567) using chloroform + methanol + glacial acetic acid- 5:4:1 (v/v/v) mobile phase.

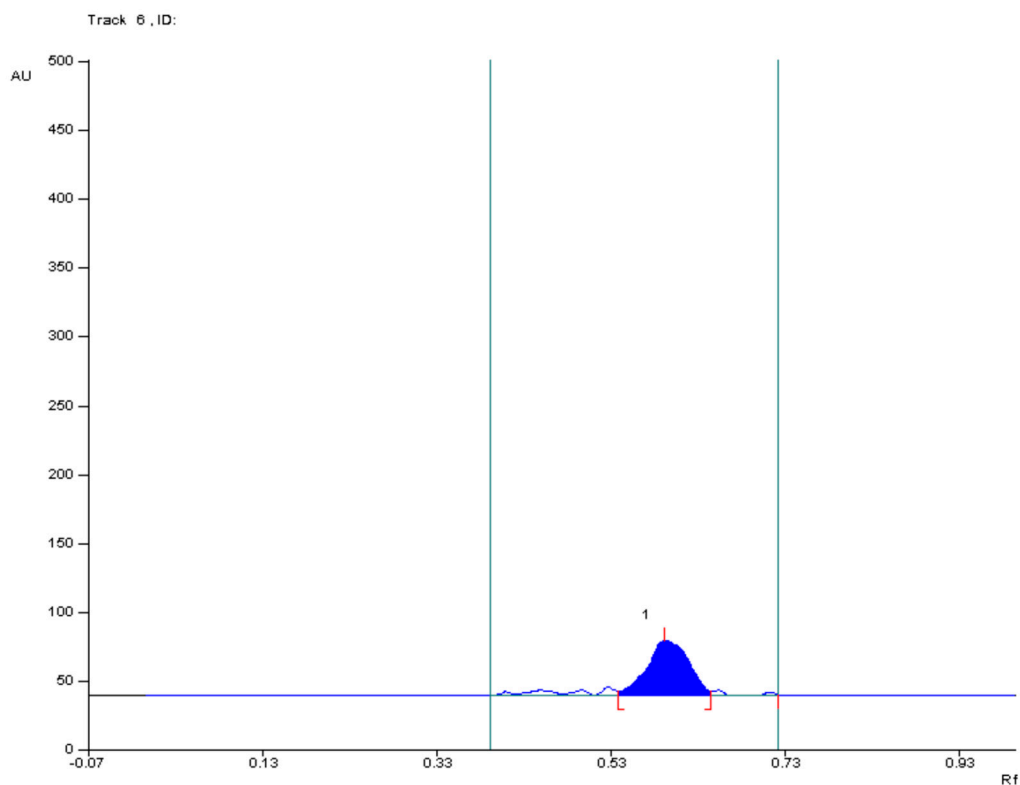

**Figure S8.** Densitogram of fluoxetine analyzed on mixture of silica gel 60 and kieselghur F<sub>254</sub> (1.05567) using chloroform + methanol + glacial acetic acid- 5:4:1 (v/v/v) mobile phase.

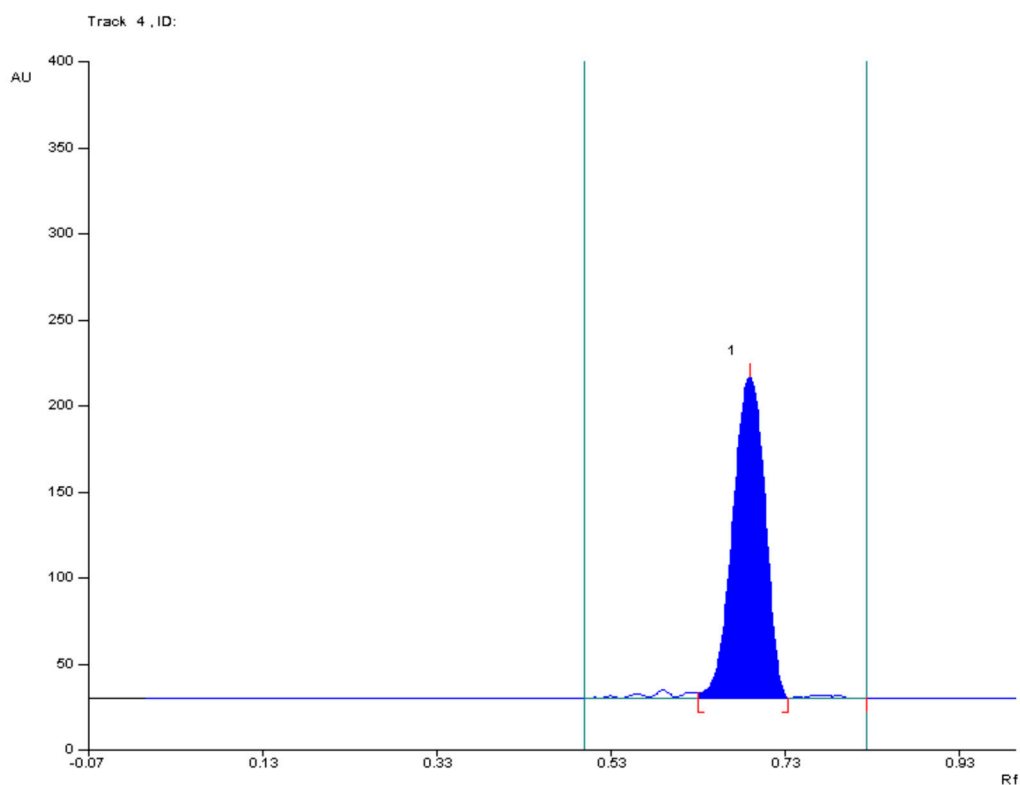

**Figure S9.** Densitogram of sertraline analyzed on silica gel 60 F<sub>254</sub> (1.05715) using acetone + toluene + ammonia- 10:9:1 (v/v/v) mobile phase.

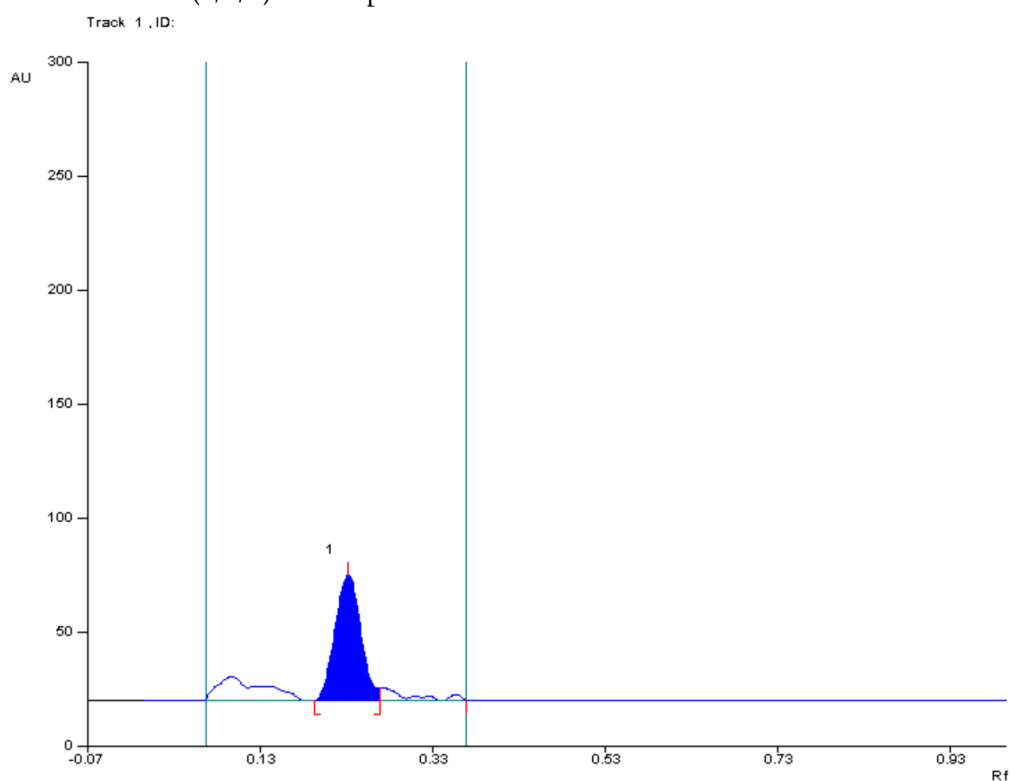

**Figure S10.** Densitogram of fluoxetine analyzed on silica gel 60 F<sub>254</sub> (1.05715) using acetone + toluene + ammonia- 10:9:1 (v/v/v) mobile phase.

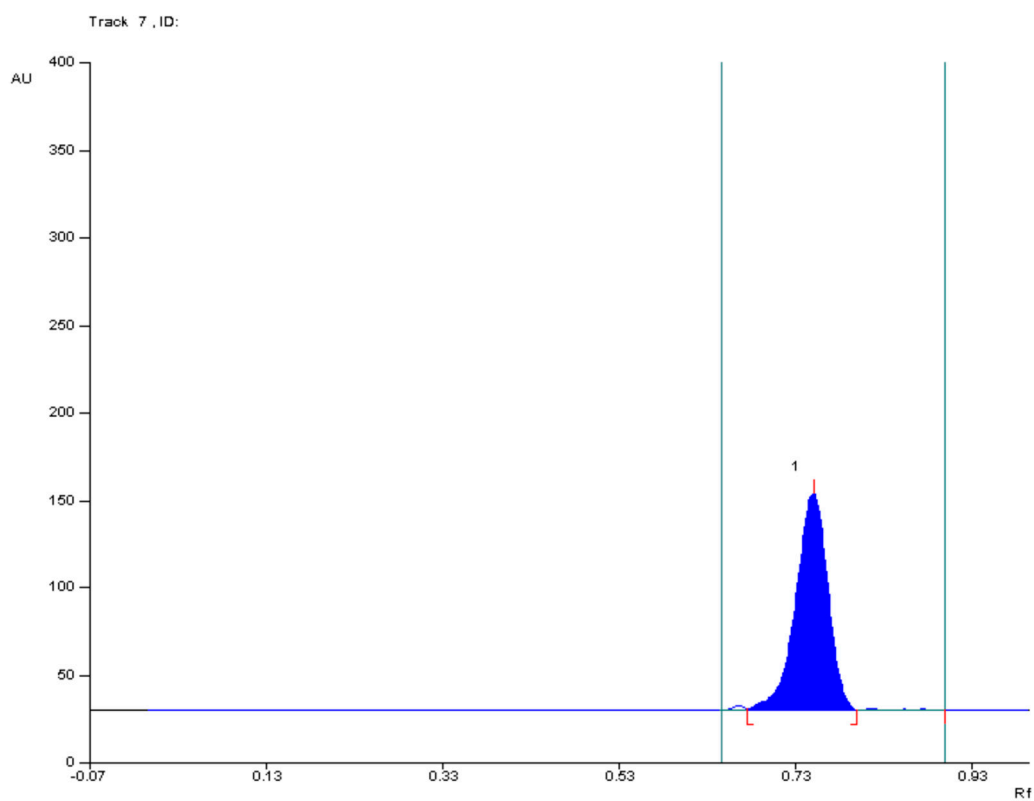

**Figure S11.** Densitogram of sertraline analyzed on mixture of silica gel 60 and kieselghur  $F_{254}$  (1.05567) using acetone + toluene + ammonia- 10:9:1 (v/v/v) mobile phase.

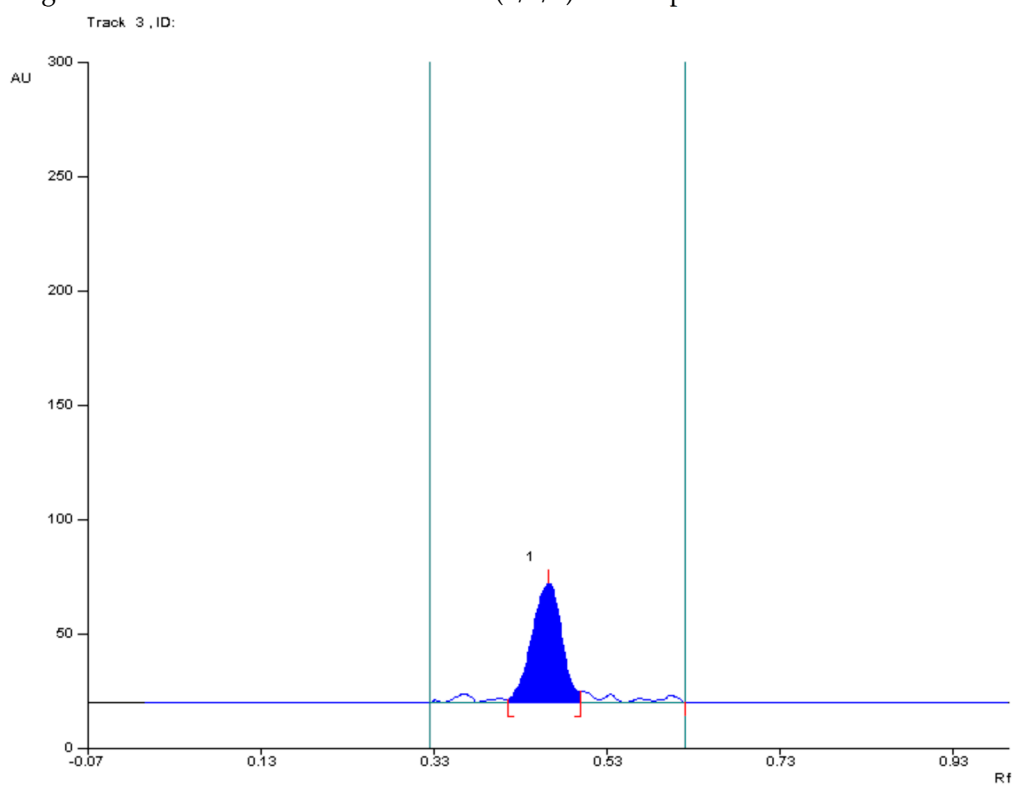

**Figure S12.** Densitogram of sertraline analyzed on mixture of silica gel 60 and kieselghur  $F_{254}$  (1.05567) using acetone + toluene + ammonia- 10:9:1 (v/v/v) mobile phase.

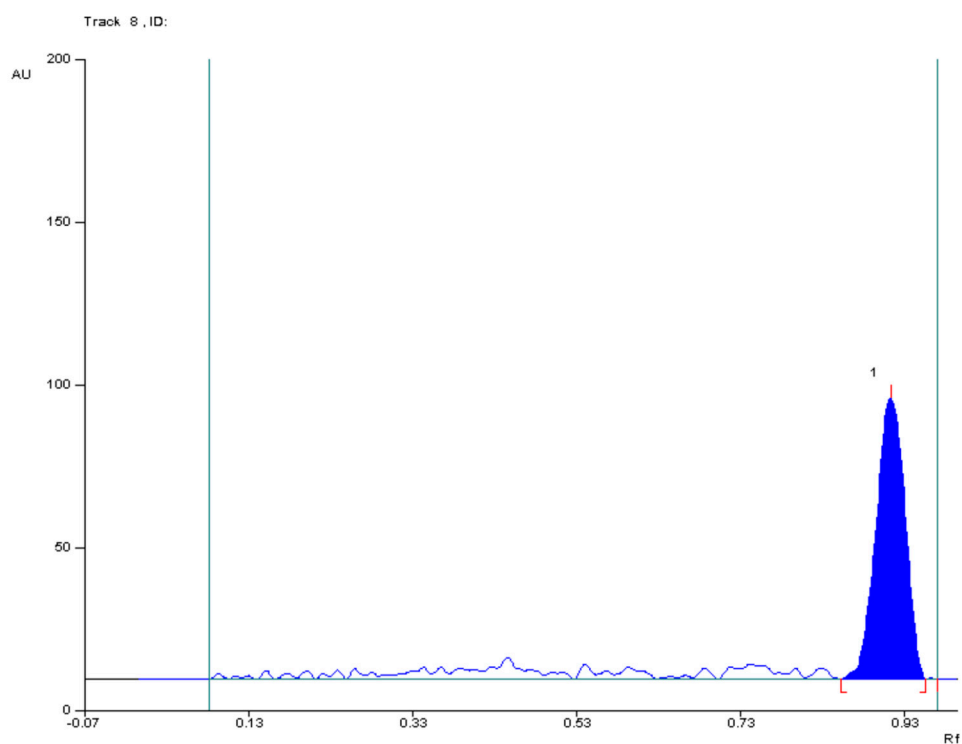

**Figure S13.** Densitogram of sertraline analyzed on silanized silica gel 60 (RP-2) (1.05747) using acetone + toluene + ammonia- 10:9:1 (v/v/v) mobile phase.

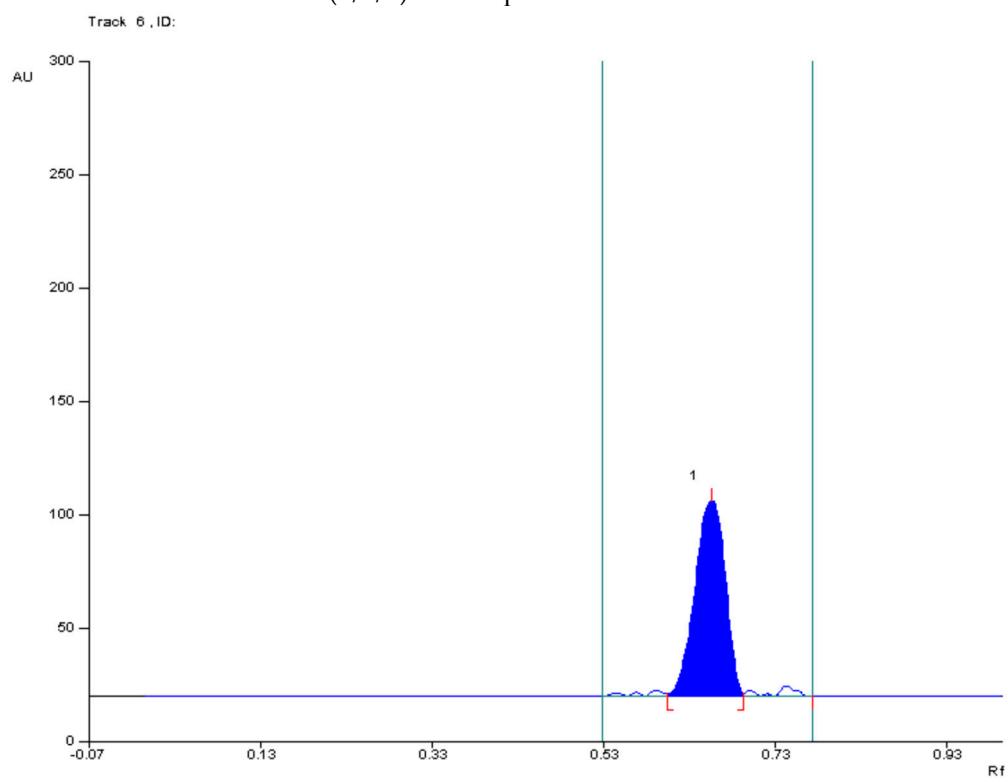

**Figure S14.** Densitogram of fluoxetine analyzed on silanized silica gel 60 (RP-2) (1.05747) using acetone + toluene + ammonia- 10:9:1 (v/v/v) mobile phase.

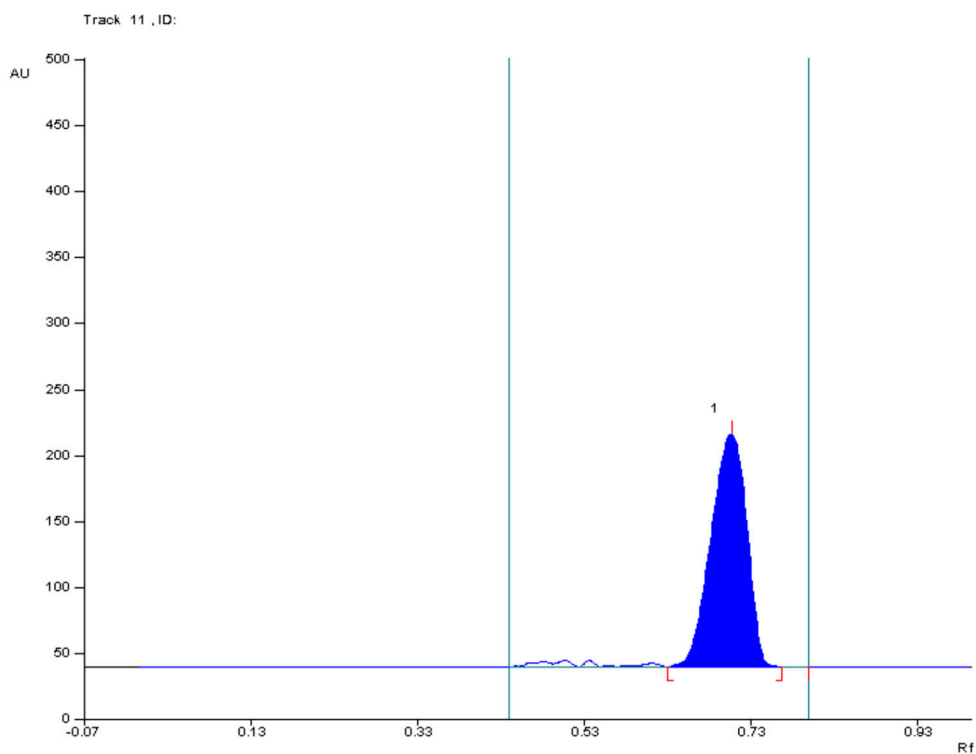

**Figure S15.** Densitogram of sertraline analyzed on silanized silica gel 60 (RP-2) (1.05747) using methanol+water 10:0 (v/v) mobile phase.

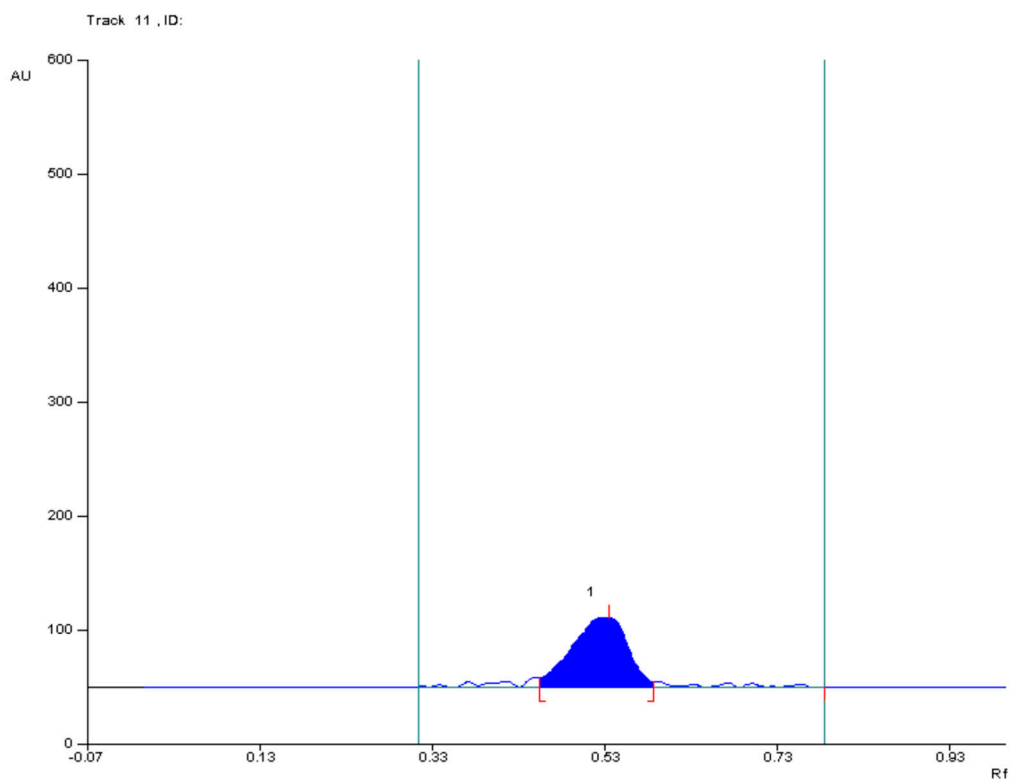

**Figure S16.** Densitogram of fluoxetine analyzed on silanized silica gel 60 (RP-2) (1.05747) using methanol+water 10:0 (v/v) mobile phase.



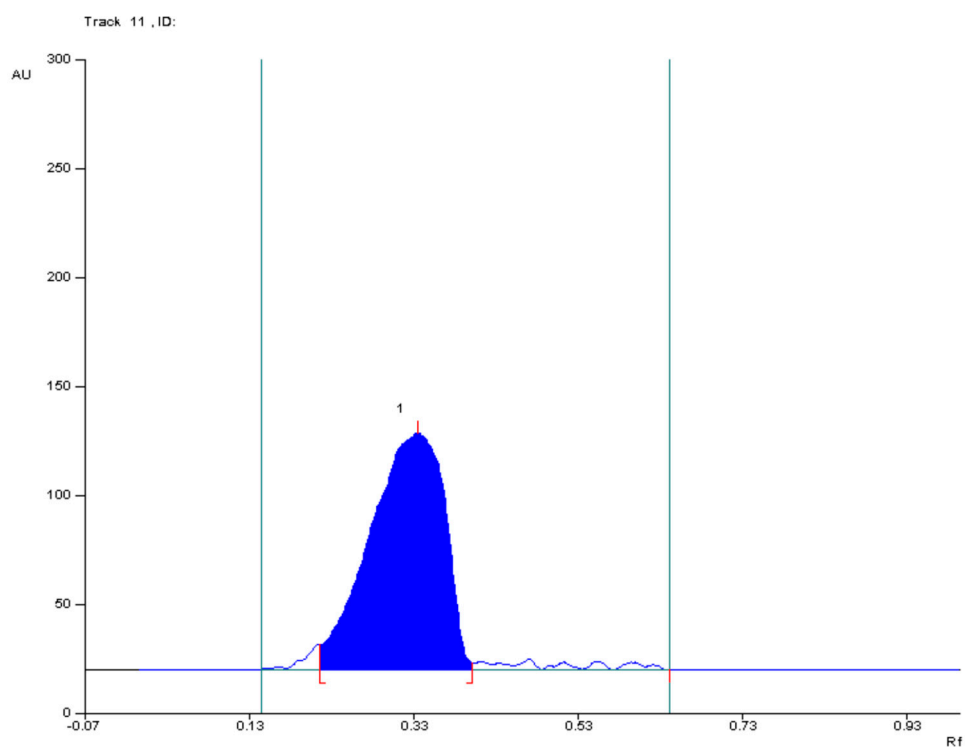

**Figure S17.** Densitogram of sertraline analyzed on silanized silica gel 60 (RP-2) (1.05747) using acetone+water 10:0 (v/v) mobile phase.

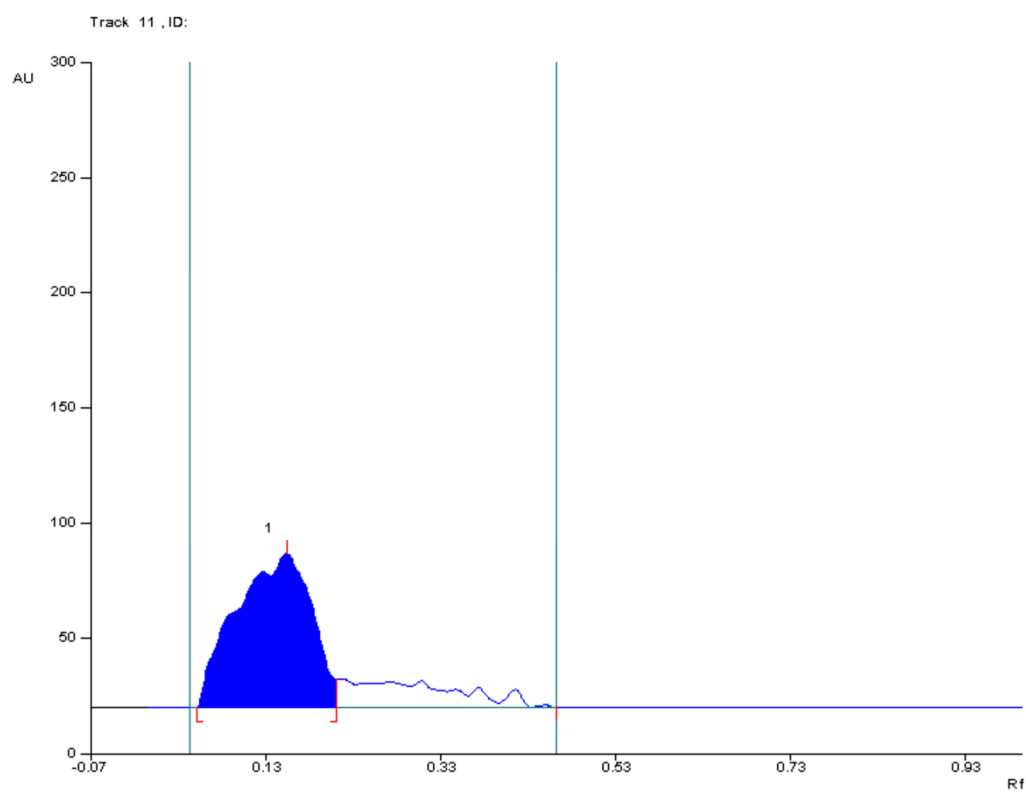

**Figure S18.** Densitogram of fluoxetine analyzed on silanized silica gel 60 (RP-2) (1.05747) using acetone+water 10:0 (v/v) mobile phase.

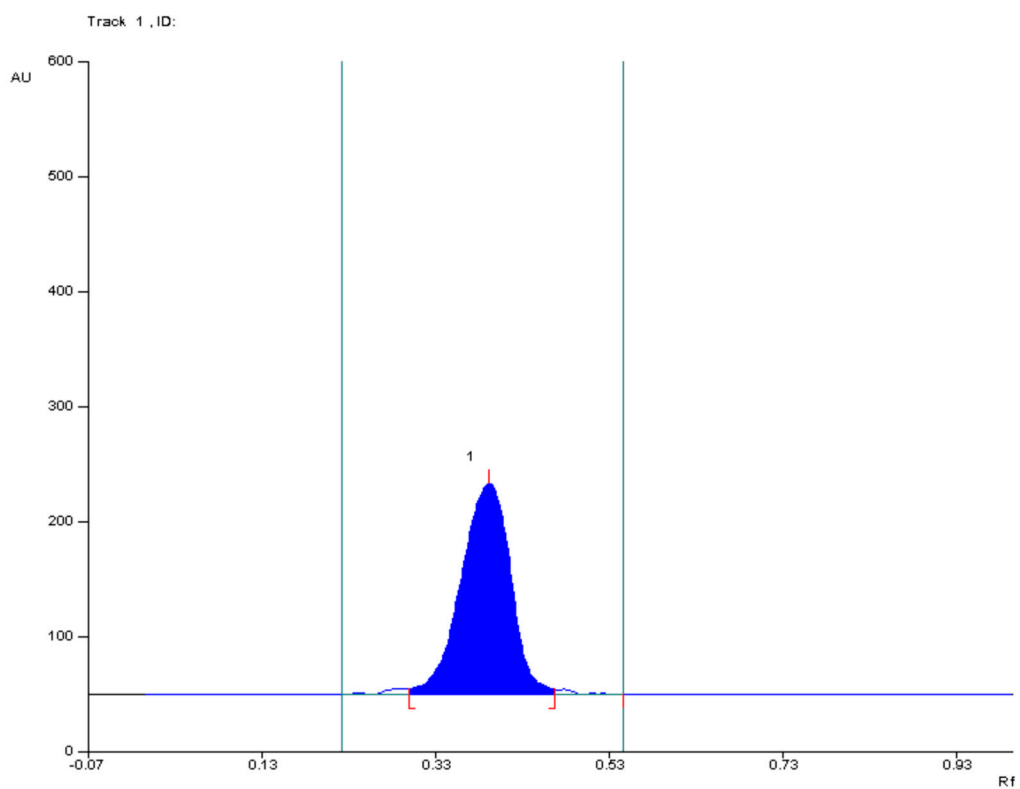

**Figure S19.** Densitogram of sertraline analyzed on silanized silica gel 60 (RP-2) (1.05747) using methanol+water 9:1 (v/v) mobile phase.

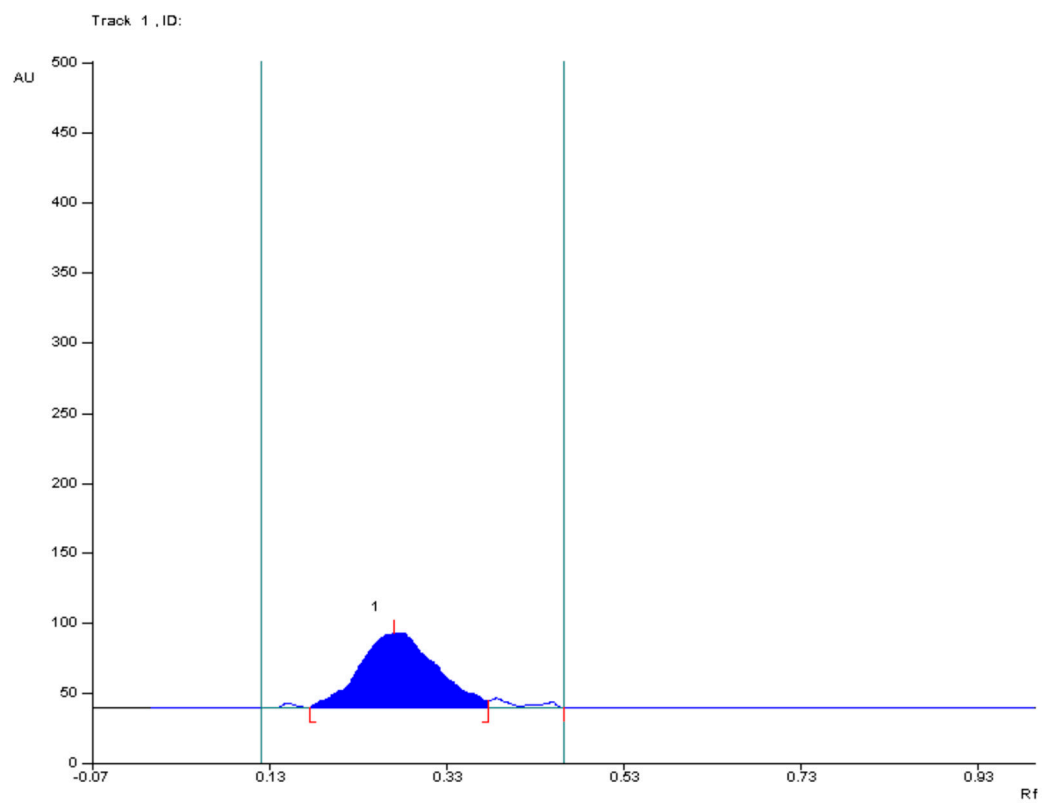

**Figure S20.** Densitogram of fluoxetine analyzed on silanized silica gel 60 (RP-2) (1.05747) using methanol+water 9:1 (v/v) mobile phase.

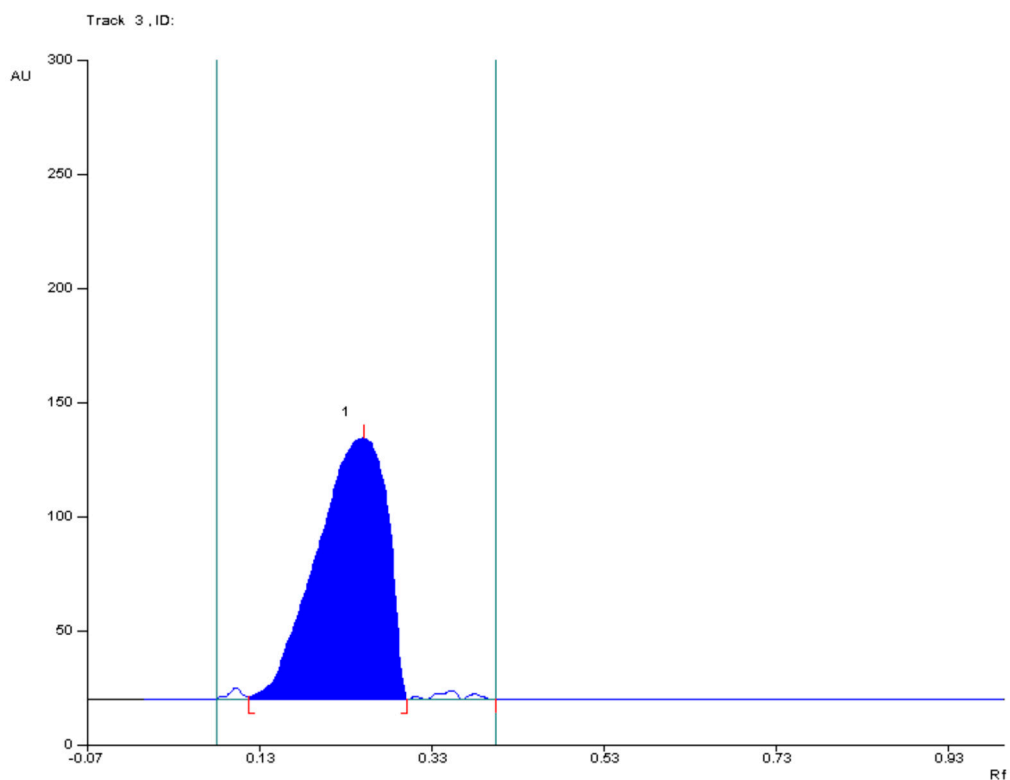

**Figure S21.** Densitogram of sertraline analyzed on silica gel RP-18F<sub>254</sub> (1.05559) using methanol+water 9:1 (v/v) mobile phase.

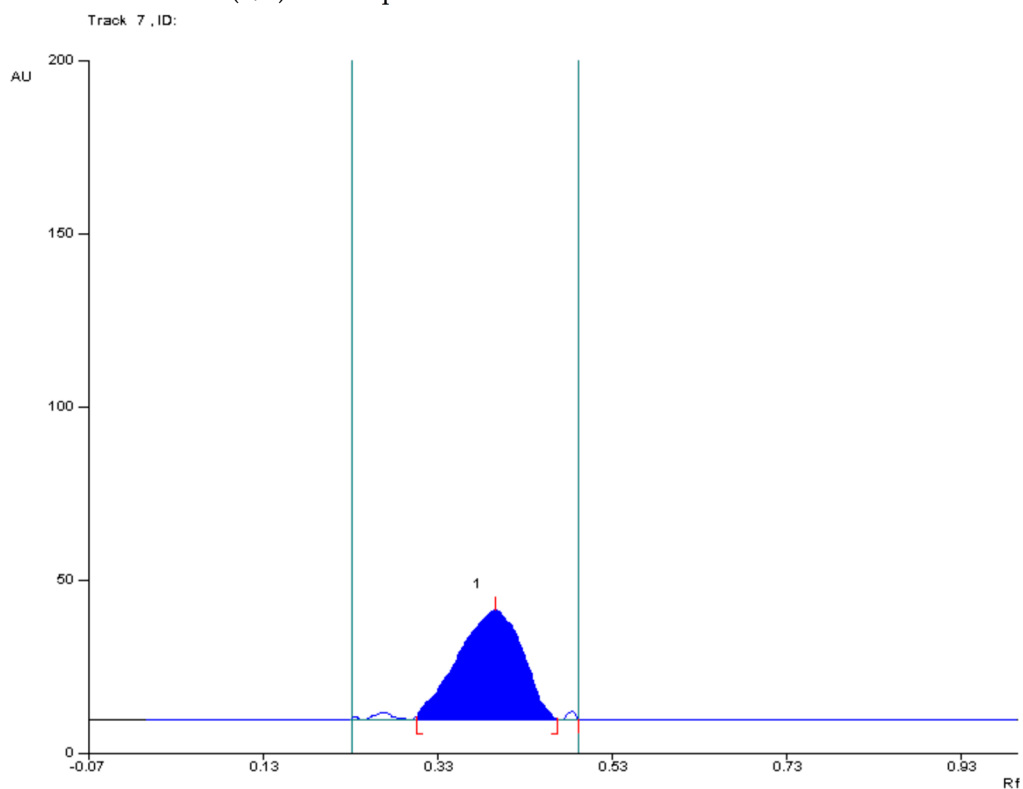

**Figure S22.** Densitogram of fluoxetine analyzed on silica gel RP-18F<sub>254</sub> (1.05559) using methanol+water 9:1 (v/v) mobile phase.
